# Supplementary material for: In Silico Evaluation of Antifungal Compounds from Marine Sponges against COVID-19-Associated Mucormycosis
Source: MDPI journal article supplement (doi:10.3390/md20030215), 2022-03-20
Supplement: s1 [file s1]

## Supplementary Information Document

### 1. FASTA sequences: Protein targets

#### A. CoH3 (Cot H region):

```
>EIE87171.1:213-470 hypothetical protein R03G_11882 [Rhizopus delemar RA 99-880]
DPTQIRERLYSDILHAMGTYANDATMVRLFINNQGFQTFNMLDDITQFSYINAKFYNGKPPATLGPLYDG
ASGADFLYHPGNLDGYSSWVANTANPNGEAYEALDPLCKAWNETTYTDNTAIANFEKMFDLDRFMRFMVI
EYLTADWDGYWMGQTNDGAYRDPDTNNKWFYFLDQDFDGTFGVNLAAPEGNAFLDVSFKDFPSRYPGAVMI
NNLLQNADKKATFEKYLTTETVRVLFNNVTLTNRVLALHNFLLPDLEWD
```

#### B. Mucoridin:

```
>EIE81863.1 hypothetical protein R03G_06568 [Rhizopus delemar RA 99-880]
MYFEEGRLLFFIKSQFNGRVLDDVEDGSTEDDANIIVYTQKYEDCLNQLWRYENGYFINAKSAKVLDIRGGE
MQPESQIIQYAQKMVEEAANQRWAIDEDGYIFCEARPDLVLDIQGAEDDCVPVILYERREGEVSANQRW
ELVPFEG
```

#### C. Exo-1,3-beta-glucan synthase:

```
>4M80_1|ChainA|EXO-1,3-BETA-GLUCANASE|Candidaalbicans
GGHNVAWDYDNNVIRGVNLLGGWFVLEPYMTPLSEFPFQNGNDQSGVPVDEYHWTQTLGKEAALRILQKHWSWTEQDFKQISNLGL
NFRVRIPIGYWAFQLLDNDPYVQGGVQYLEKALGWARKNNIRVWIDLHGAPGSQNGFDNSGLRDSYNFQNGDNTQVTLNVLNTIFKKY
GGNEYSADVIGIELLNEPLGPVLNMDKLKQFFLDGYNSLRQTGSVTPVIIHDAFQVFGYWNFLTVAEGQWNVVDHHHYQVFSGGE
LSRNINDHISVACNWGDADKESHWNVAGSWAALTDCAKWLNGVNRGARYEGAYDNAPYIGSCQPLLDISQWSDEHKTDTRRYIEA
QLDAFEYTGWVFWWSKTENAPEWSFQTLTYNGLFPQPVTDRQFPNQCGFH
```

#### D. RDRP (RVT\_1 region):

```
>BAH03542.1:547-807 polyprotein [Rhizopus arrhizus]
IYKKGDPLOPANYRPISLTSVLRKLFELCLQTTLEDTPASLDPVQGGFRHSRSALDQALCLNELCRQHAI
DHHGEPPVLAFLDIKSAYDVTVDRAIIWRALETYISPAALLGLLQCLFDKVSIEVLVSGFTSPAFAWPTGVL
QGSILSPFLYSIYINSLPALLRSVRLPISARYYSSNPQREFDGLWLNCLLYADDVVLIGAPEVMPRLKA
AEEHSFSLGYRWNPAKCVVLNSAFSLGGPQLKLYGDDIPIQSTFNLYLGIPF
```

#### E. Rhizopuspepsin:

```
>1UH9_1|Chain A|rhizopuspepsin I|Rhizopus microsporus var. chinensis
AGVGTVPMTDYGNDIEYYQVITIGTPGKKFNLDFTGSSDLWIASTLCTNCGSRQTKYDPNQSSYQADGRTWSISYGDGSSASGIL
AKDNVNPLGGLLIKGQTIELAKREAASFASGPNDGLLGLGFDITITVRGVKTPMDNLSQGLISRPIFGVYLGAKNGGGGEYIFGGY
DSTKFKGSLTTVPIDNSRGWGWGITVDRATVGTSTVASSFDGILDGTGTLTLLILPNNIAASVARAYGASDNGDGTYTISCDTSRFKPLV
FSINGASFQVSPDSLVEEFQGCIAFGYGNWDFAIIGDTFLKNYVVFNQGVPEVQIAPVAE
```

#### F. Lanosterol 14-alpha demethylase:

```
>EIE87079.1 lanosterol 14-alpha demethylase [Rhizopus delemar RA 99-880]
MAVISTLLPTLESIPLYAVLALGVFVIINILSQWFGPKNPKEPPVVFVSWIPFMGNAIEFGINPIAFLQKC
QKKYGDVFTFYMVGKRVTVFLNADGNQFVFNKQNLTSAADAYNHMTKHVFGPEVVYDAPHSVFMEQKRF
IKAGLNSSESFRQHVPIMIVEEVEGFFKNYKKPTGAFTDAYHTLGLIICTASRCLMGKEIRASLDDSVAGLY
YDLQGFQKPINFIFFPNLPLPSYRKRDRVARQKMTDLYSSIIARRKAENDFSNADLLQALMDANYKDGSNVP
DHHIAGMMIAVLFGGQHTSATTSAWTLLELAARPDLIRDLREEQITKLGLSKADLTFDNLKELTLLDSCV
RETLRLHPPFIQMMRRVTANKVVFECTGHEIPKGNFLCAVPGVTQVDSQYFNEPLKYDPLRWINLTDPVH
SMEAGDDSNIDYGFAGVGISSKNPFLPFGAGRHRHCIGEQFGYLQIKTIIATIIIRLFDIELEDGKGVPKSD
YTSMVVVPERPSNIKYTWRE
```

#### G. Lipase:

```
>6A0W_1|Chain A|Lipase|Rhizopus chinensis
DTETVGGMTLDLPENPPPIPATSTAPSSDSGEVVTATAAQIKELTNYAGVAATAYCRSVVPGTKWDCKQCLKYVPDGKLIKTFTSLL
TDTNGFILRSDAQKTIYVTFRGTSNFRSAITDMVFTFTDYSPVKGAKVHAGFLSSYNQVVKDYFPVVQDQLTAYPDYKVIIVTGHSLG
GAQALLAGMDLYQREKRLSPKNLSIYTVGCPRVGNNAFAYYVDSTGIPFHRVTHKRDIVPHVPPQAFGYLHPGVESWIKEDPADVQI
CTSNIETKQCSNSIVPFTSIADHLTYFGINEGSCLGSSHHHHHH
```

**Table S1:** List of ligands with respective SMILES line notations used in the study

| Ligands            | SMILES                                                                                                       |
|--------------------|--------------------------------------------------------------------------------------------------------------|
| Naamine A          | <chem>CN1C(=C(N=C1N)CC2=CC=C(C=C2)OC)CC3=CC=C(C=C3)O</chem>                                                  |
| Naamine B          | <chem>CN1C(=C(N(C1=N)C)CC2=CC(=C(C=C2)OC)O)CC3=CC=C(C=C3)OC</chem>                                           |
| Naamine D          | <chem>COC1=CC=C(C=C1)CC2=C(N=C(N2)N)CC3=CC=C(C=C3)OC</chem>                                                  |
| Naamine E          | <chem>CN1C(=C(N=C1N)CC2=CC=C(C=C2)OC)CC3=CC(=C(C(=C3)O)OC)O</chem>                                           |
| Naamine F          | <chem>CN1C(=C(N=C1N)CC2=CC=C(C=C2)OC)CC3=CC(=C(C(=C3)O)OC)OC</chem>                                          |
| Naamine G          | <chem>CN1C(=C(N=C1N)CC2=CC=C(C=C2)OC)CC3=CC(=C(C(=C3)OC)O)OC</chem>                                          |
| Naamidine A        | <chem>CN1C(=C(N=C1N=C2C(=O)N(C(=O)N2)C)CC3=CC=C(C=C3)OC)CC4=CC=C(C=C4)O</chem>                               |
| Naamidine B        | <chem>CN1C(=C(N=C1N=C2C(=O)N(C(=O)N2)C)CC3=CC=C(C=C3)OC)CC4=CC(=C(C(=C4)OC)O)O</chem>                        |
| *Naamidine C       | <chem>CN1C(C(NC1N=C2C(=O)N(C(=O)N2)C)CC3CCC(CC3)OC)CC4CCC(CC4)O</chem>                                       |
| Hyrtimomine A      | <chem>C1=CC2=C(C=C1O)C3=C(N2)OC4=C5C3=NC=CC6=CNC(=C65)C=C4</chem>                                            |
| Hyrtimomine B      | <chem>C1C(NC2=C3C(=CC=C4C3=C1C=N4)OC5=C2C6=C(N5)C=CC(=C6)O)C(=O)O</chem>                                     |
| Hyrtimomine C      | <chem>C1C(=O)C2=CNC3=C2C(=C(C=C3)O)C(=N1)C4=CNC5=C4C=C(C=C5)O</chem>                                         |
| Hyrtimomine F      | <chem>C1=CC2=C(C=C1O)C(=CN2)C(=O)C3C4=C(C=CC5=C4C(=CN5)C(=O)C(=O)N3)O</chem>                                 |
| Hyrtimomine G      | <chem>C1=CC2=C(C=C1O)C(=CN2)C(=O)C(C(C(=O)C3=CNC4=C3C=C(C=C4)O)O)O</chem>                                    |
| Topsentin          | <chem>C1=CC=C2C(=C1)C(=CN2)C3=CN=C(N3)C(=O)C4=CNC5=C4C=CC(=C5)O</chem>                                       |
| Topsentin A        | <chem>C1=CC=C2C(=C1)C(=CN2)C3=CN=C(N3)C(=O)C4=CNC5=CC=CC=C54</chem>                                          |
| Topsentin D        | <chem>C1C(NC(=N1)C(=O)C2=CNC3=CC=CC=C32)C4=CNC5=CC=CC=C54</chem>                                             |
| Latrunculin A      | <chem>CC1CCC2CC(CC(O2)(C3CSC(=O)N3)O)OC(=O)C=C(CCC=CC=C1)C</chem>                                            |
| Latrunculin B      | <chem>CC1CCC2CC(CC(O2)(C3CSC(=O)N3)O)OC(=O)C=C(CCC=C1)C</chem>                                               |
| Latrunculin S      | <chem>CC1CCC(CC(OC(=O)C=C(CCC=CC=C1)C)CC(C2CSC(=O)N2)O)O</chem>                                              |
| Xestodecalactone A | <chem>CC1CCCC(=O)C2=C(CC(=O)O1)C=C(C=C2O)O</chem>                                                            |
| Xestodecalactone B | <chem>CC1CC(CC(=O)C2=C(CC(=O)O1)C=C(C=C2O)O)O</chem>                                                         |
| Xestodecalactone C | <chem>CC1CC(CC(=O)C2=C(CC(=O)O1)C=C(C=C2O)O)O</chem>                                                         |
| Xestodecalactone D | <chem>CC1CC(CC(=O)C2=C(C(=C(C=C2CC(=O)O1)O)OC)O)O</chem>                                                     |
| Xestodecalactone E | <chem>CCCCOC1CC(OC(=O)CC2=CC(=C(C(=C2C(=O)C1)O)OC)O)C</chem>                                                 |
| Xestodecalactone F | <chem>CCCCOC1CC(OC(=O)CC2=CC(=C(C(=C2C=C1)O)OC)O)C</chem>                                                    |
| (+)-Curcudiol      | <chem>CC1=CC(=C(C=C1)C(C)CCCC(C)(C)O)O</chem>                                                                |
| (+)-Curcuphenol    | <chem>CC1=CC(=C(C=C1)C(C)CCC=C(C)C)O</chem>                                                                  |
| *Tetillapyrone     | <chem>CC1CC(C(OC1=O)O)[C@@H]2C[C@H]([C@@H](O2)CO)O</chem>                                                    |
| *Nortetillapyrone  | <chem>C1CC(OC(=O)C1[C@@H]2C[C@H]([C@@H](O2)CO)O)O</chem>                                                     |
| Aurantioside I     | <chem>CC1C(C(C(O1)OC2COC(C(C2O)O)OC3C(C(COC3N4C(C(=O)C(=C(C=CC=CC=CC=C(C(C)Cl)O)C4=O)CC(=O)N)O)O)OC)O</chem> |

|                |                                                                                                                               |
|----------------|-------------------------------------------------------------------------------------------------------------------------------|
| Aurantioside K | <chem>CC1C(C(C(O1)OC2COC(C(C2O)O)OC3C(C(COC3N4C(C(=O)C(=C(C=CC=CC=CC=C(C)Cl)O)C4=O)CC(=O)N)O)O)O)O</chem>                     |
| <b>Drugs</b>   |                                                                                                                               |
| Amphotericin B | <chem>CC1C=CC=CC=CC=CC=CC=CC(CC2C(C(CC(O2))(CC(CC(C(CCC(CC(CC(=O)OC(C(C1O)C)C)O)O)O)O)O)O)C(=O)O)OC3C(C(C(C(O3)C)O)N)O</chem> |
| Isavuconazole  | <chem>CC(C1=NC(=CS1)C2=CC=C(C=C2)C#N)C(CN3C=NC=N3)(C4=C(C=CC(=C4)F)F)O</chem>                                                 |
| Posaconazole   | <chem>CCC(C@O)N1C(=O)N(C=N1)C2=CC=C(C=C2)N3CCN(CC3)C4=CC=C(C=C4)OCC5CC(OC5)(CN6C=NC=N6)C7=C(C=C(C=C7)F)F</chem>               |

(\*Naamidine C, Tetillapyrone and Nortetillapyrone – Isomeric SMILES from Chemspider database)

**Table S2:** Ligands information and its chemical classification

| Ligand Information |                                                                              |             |                          |
|--------------------|------------------------------------------------------------------------------|-------------|--------------------------|
| Ligands            | Formulae                                                                     | Pubchem CID | Class                    |
| Naamine A          | C <sub>19</sub> H <sub>21</sub> N <sub>3</sub> O <sub>2</sub>                | 10019087    | Alkaloids                |
| Naamine B          | C <sub>21</sub> H <sub>25</sub> N <sub>3</sub> O <sub>3</sub>                | 11233956    |                          |
| Naamine D          | C <sub>19</sub> H <sub>21</sub> N <sub>3</sub> O <sub>2</sub>                | 482905      |                          |
| Naamine E          | C <sub>20</sub> H <sub>23</sub> N <sub>3</sub> O <sub>4</sub>                | 10970661    |                          |
| Naamine F          | C <sub>20</sub> H <sub>23</sub> N <sub>3</sub> O <sub>3</sub>                | 21578946    |                          |
| Naamine G          | C <sub>21</sub> H <sub>25</sub> N <sub>3</sub> O <sub>4</sub>                | 11153300    |                          |
| Naamidine A        | C <sub>23</sub> H <sub>23</sub> N <sub>5</sub> O <sub>4</sub>                | 135455949   |                          |
| Naamidine B        | C <sub>24</sub> H <sub>25</sub> N <sub>5</sub> O <sub>5</sub>                | 135511072   |                          |
| *Naamidine C       | C <sub>24</sub> H <sub>25</sub> N <sub>5</sub> O <sub>4</sub>                | 10313314    |                          |
| Hyrtimomine A      | C <sub>19</sub> H <sub>11</sub> N <sub>3</sub> O <sub>2</sub>                | 71681276    |                          |
| Hyrtimomine B      | C <sub>20</sub> H <sub>13</sub> N <sub>3</sub> O <sub>4</sub>                | 136267825   |                          |
| Hyrtimomine C      | C <sub>19</sub> H <sub>13</sub> N <sub>3</sub> O <sub>3</sub>                | 136267826   |                          |
| Hyrtimomine F      | C <sub>20</sub> H <sub>13</sub> N <sub>3</sub> O <sub>5</sub>                | 73774545    |                          |
| Hyrtimomine G      | C <sub>20</sub> H <sub>16</sub> N <sub>2</sub> O <sub>6</sub>                | 73774544    |                          |
| Topsentin          | C <sub>20</sub> H <sub>14</sub> N <sub>4</sub> O <sub>2</sub>                | 72457       |                          |
| Topsentin A        | C <sub>20</sub> H <sub>14</sub> N <sub>4</sub> O                             | 183527      |                          |
| Topsentin D        | C <sub>20</sub> H <sub>16</sub> N <sub>4</sub> O                             | 12018820    |                          |
| Latrunculin A      | C <sub>22</sub> H <sub>31</sub> NO <sub>5</sub> S                            | 445420      | Macrolides               |
| Latrunculin B      | C <sub>20</sub> H <sub>29</sub> NO <sub>5</sub> S                            | 6436219     |                          |
| Latrunculin S      | C <sub>22</sub> H <sub>33</sub> NO <sub>5</sub> S                            | 10093792    |                          |
| Xestodecalactone A | C <sub>14</sub> H <sub>16</sub> O <sub>5</sub>                               | 637028      | Bioactive Metabolites    |
| Xestodecalactone B | C <sub>14</sub> H <sub>16</sub> O <sub>6</sub>                               | 9943580     |                          |
| Xestodecalactone C | C <sub>14</sub> H <sub>16</sub> O <sub>6</sub>                               | 11033245    |                          |
| Xestodecalactone D | C <sub>15</sub> H <sub>18</sub> O <sub>7</sub>                               | 60154235    |                          |
| Xestodecalactone E | C <sub>19</sub> H <sub>26</sub> O <sub>7</sub>                               | 60154236    |                          |
| Xestodecalactone F | C <sub>19</sub> H <sub>26</sub> O <sub>6</sub>                               | 139584779   |                          |
| (+)-Curcudiol      | C <sub>15</sub> H <sub>24</sub> O <sub>2</sub>                               | 184024      | Sesquiterpene phenols    |
| (+)-Curcuphenol    | C <sub>15</sub> H <sub>22</sub> O                                            | 156118      |                          |
| *Tetillapyrone     | C <sub>11</sub> H <sub>14</sub> O <sub>6</sub>                               | 10213954    | Hydroxypyran-2-ones      |
| *Nortetillapyrone  | C <sub>10</sub> H <sub>12</sub> O <sub>6</sub>                               | 10213956    |                          |
| Aurantioside I     | C <sub>34</sub> H <sub>45</sub> ClN <sub>2</sub> O <sub>15</sub>             | 54723407    | Tetramic acid glycosides |
| Aurantioside K     | C <sub>33</sub> H <sub>43</sub> ClN <sub>2</sub> O <sub>15</sub>             | 86575300    |                          |
| Chemspider ID      |                                                                              |             |                          |
| Amphotericin B     | C <sub>47</sub> H <sub>73</sub> NO <sub>17</sub>                             | 10237579    | Drugs                    |
| Isavuconazole      | C <sub>22</sub> H <sub>17</sub> F <sub>2</sub> N <sub>5</sub> OS             | 5293682     |                          |
| Posaconazole       | C <sub>37</sub> H <sub>42</sub> F <sub>2</sub> N <sub>8</sub> O <sub>4</sub> | 411709      |                          |

(\*Naamidine C, Tetillapyrone, and nortetillapyrone obtained from Chemspider Database)

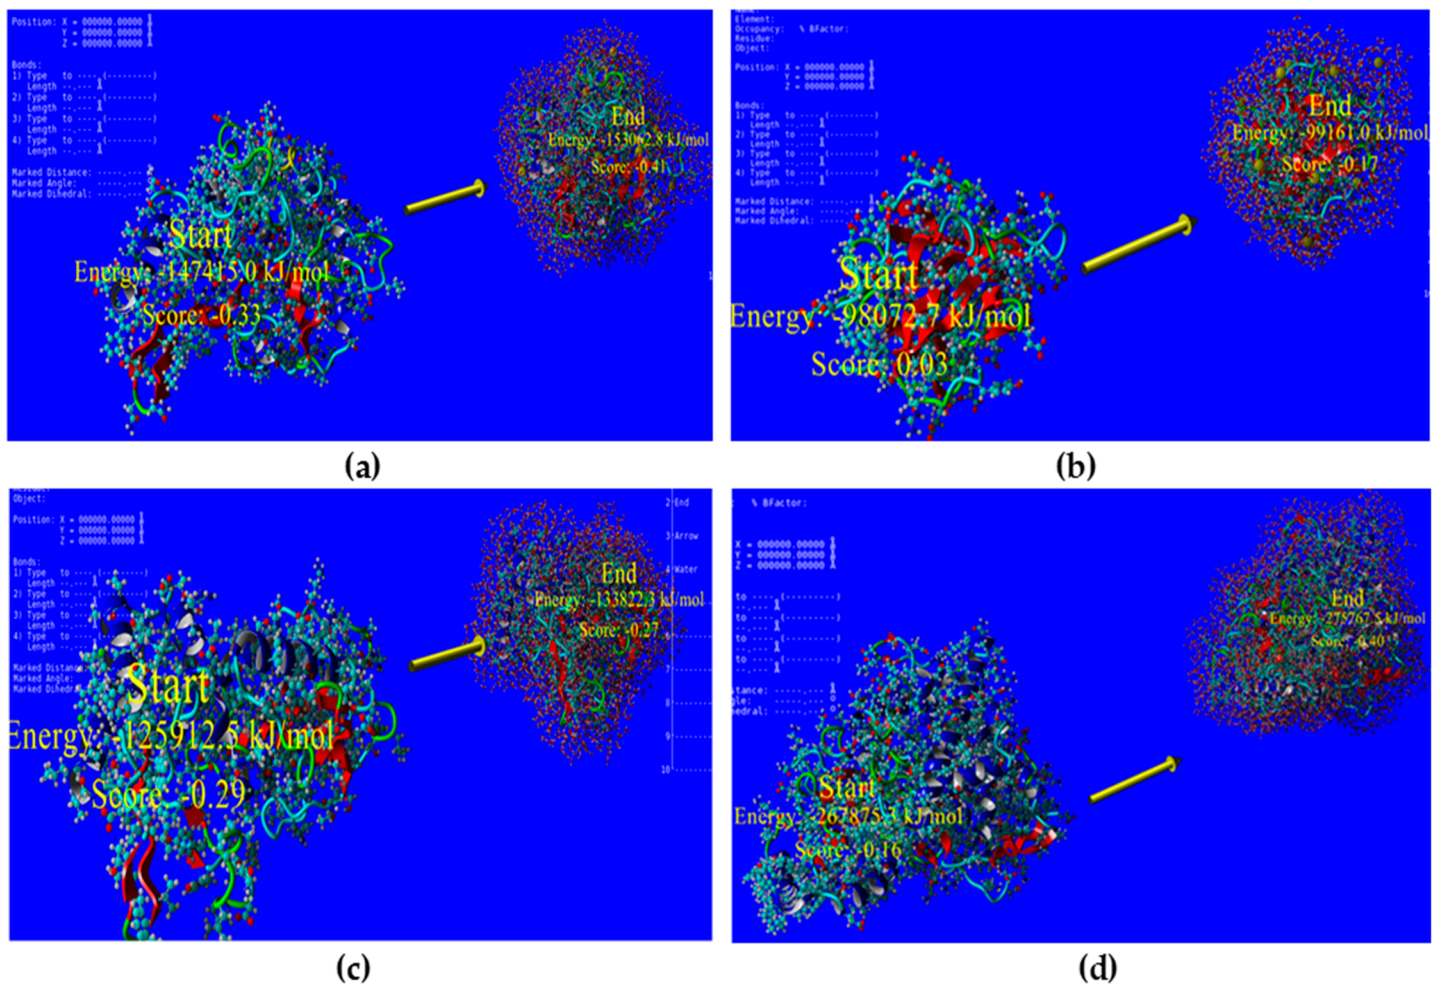

**Figure S1.** Energy minimized structures in YASARA (a) CotH3; (b) Mucoricin; (c) RdRp; (d) Lanosterol 14  $\alpha$ -demethylase.

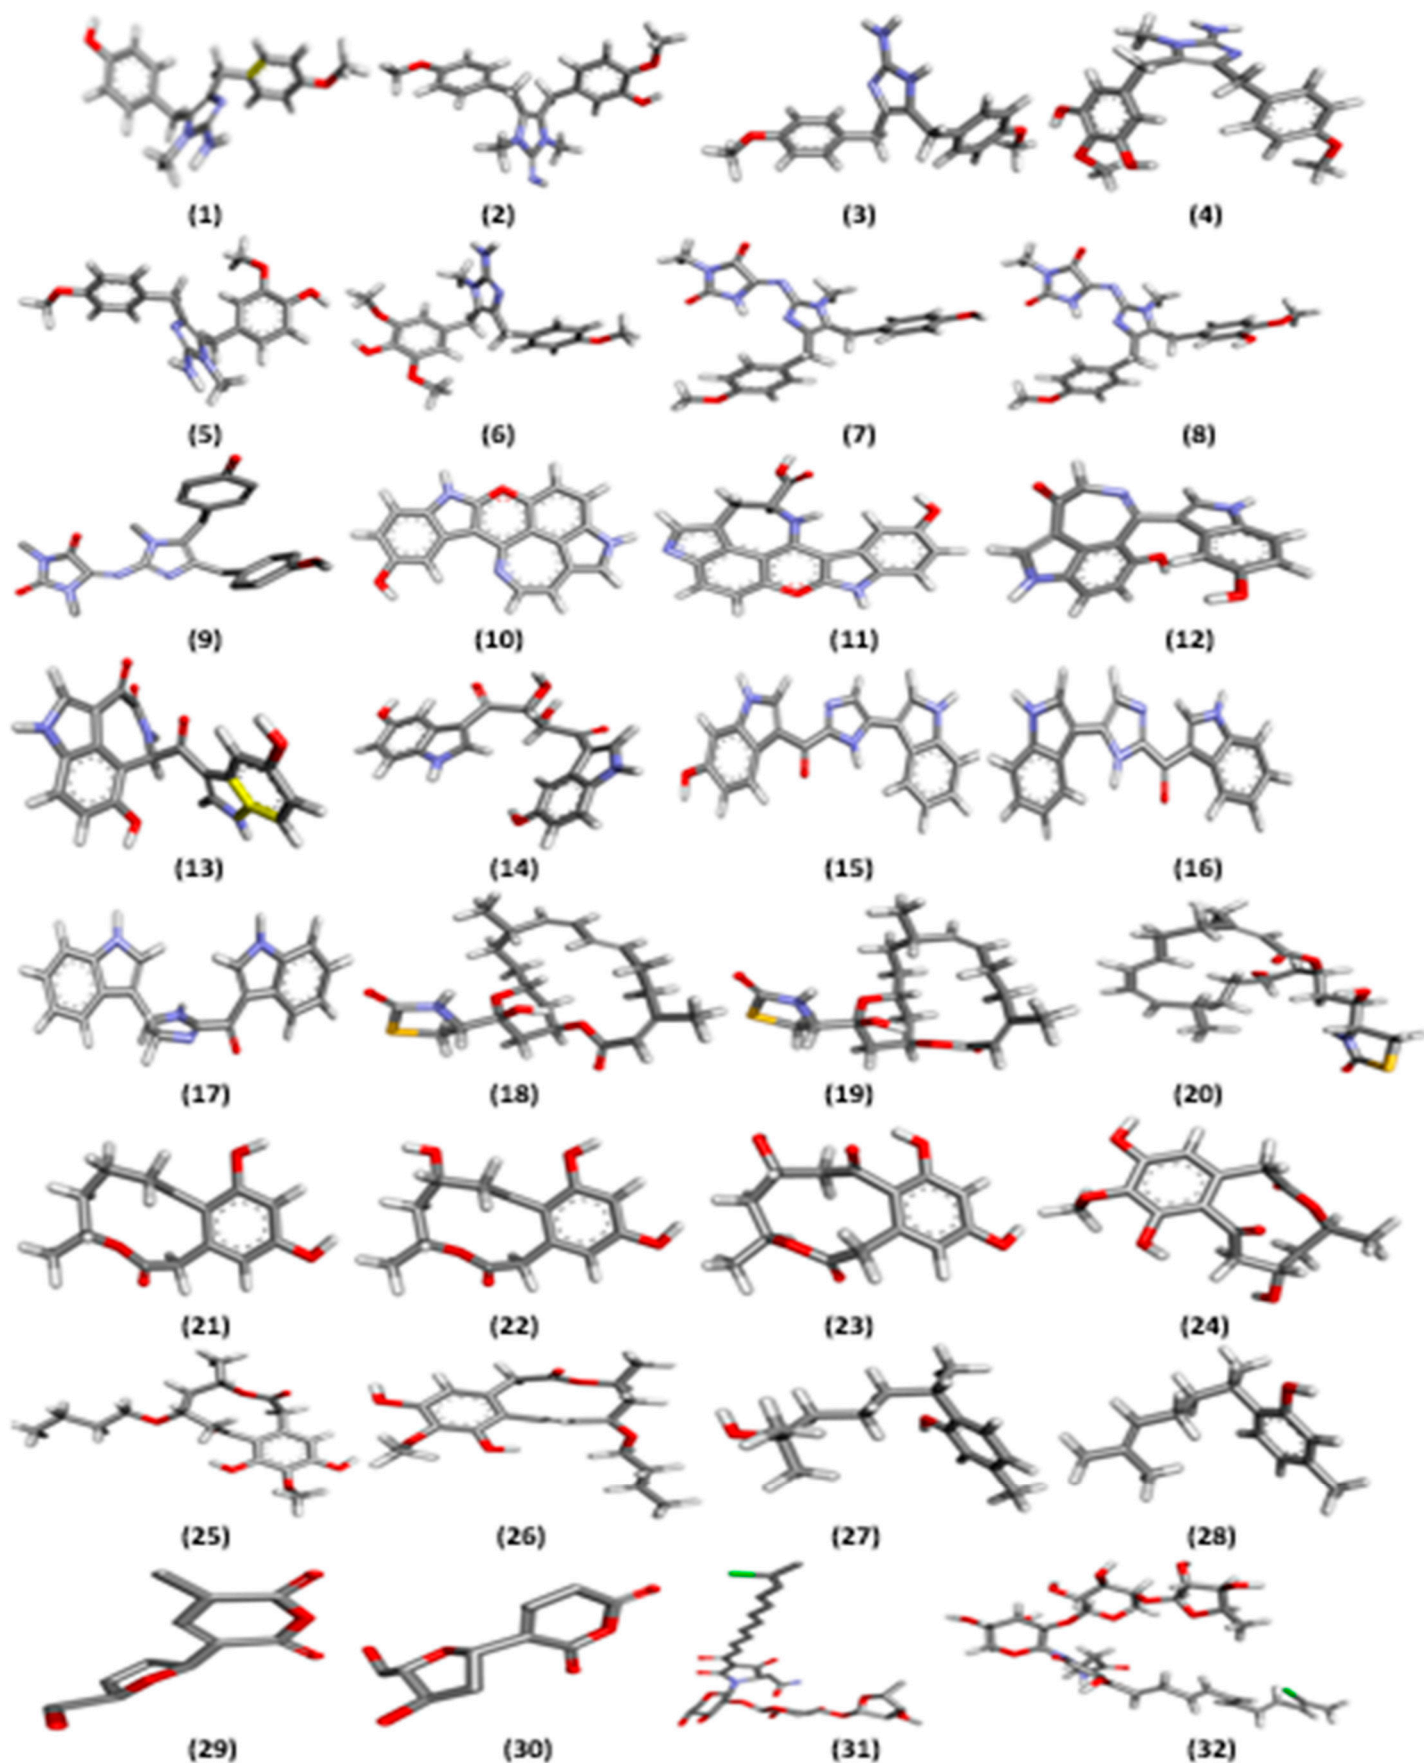

**Figure S2.** MNPs 3D structures (1) Naamine A, (2) Naamine B, (3) Naamine D, (4) Naamine E, (5) Naamine F, (6) Naamine G, (7) Naamidine A, (8) Naamidine B, (9) Naamidine C, (10) Hyrtimomine A, (11) Hyrtimomine B, (12) Hyrtimomine C, (13) Hyrtimomine F, (14) Hyrtimomine G, (15) Topsentin, (16) Topsentin A, (17) Topsentin D, (18) Latrunculin A, (19) Latrunculin B, (20) Latrunculin S, (21) Xestodecalactone A, (22) Xestodecalactone B, (23) Xestodecalactone C, (24) Xestodecalactone D, (25) Xestodecalactone E, (26) Xestodecalactone F, (27) (+)-Curcudiol, (28) (+)-Curcuphenol, (29) Tetillapyrone, (30) Nortetillapyrone, (31) Aurantioside I, (32) Aurantioside K.

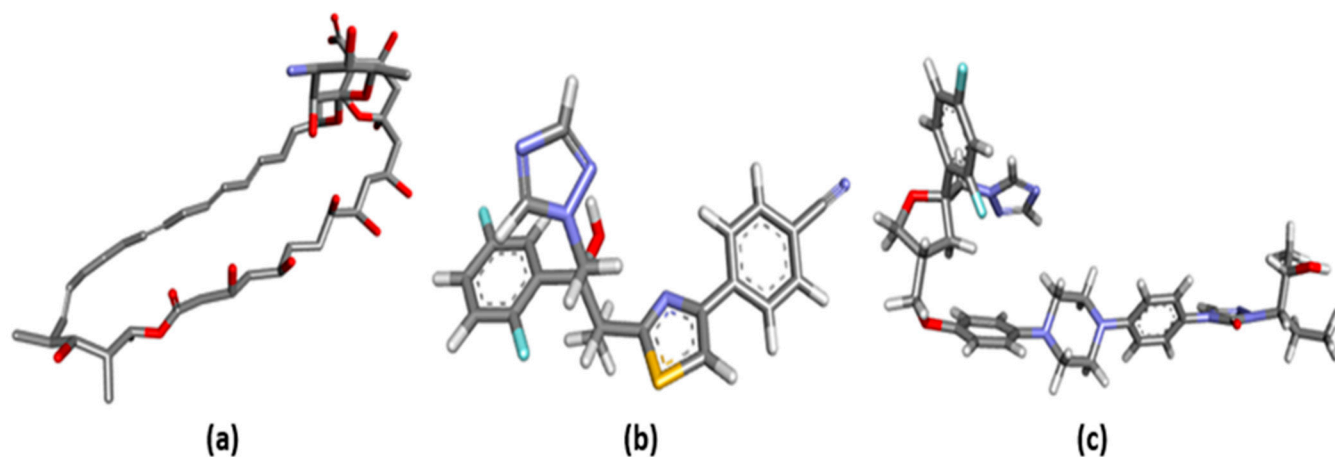

**Figure S3:** 3D structures of medical drugs (a) Amphotericin B, (b) Isavuconazole, (c) Posaconazole.

**Table S3:** Molecular docking output for the target CotH3

| CotH3          |                                  |                                                            |         |           |                   |
|----------------|----------------------------------|------------------------------------------------------------|---------|-----------|-------------------|
| Ligands        | Binding affinity<br>(Kcal/mol-1) | H bond residues                                            | H bonds | C-H bonds | Hydrophobic bonds |
| Naamine D      | -6.7                             | ASN A: 237, PHE A: 235                                     | 2       | 0         | 5                 |
| Latrunculin A  | -7.1                             | ASN A: 237                                                 | 1       | 0         | 2                 |
| Latrunculin B  | -7.2                             | None                                                       | 0       | 1         | 5                 |
| Latrunculin S  | -6.7                             | ALA A: 91, SER A: 87                                       | 2       | 0         | 0                 |
| Aurantioside I | -7.3                             | TRP A: 147, ASP A: 175, ASP A:<br>177, GLU A: 7, ASN A: 40 | 5       | 1         | 2                 |
| Aurantioside K | -7.9                             | GLN A: 4, THR A: 38, THR A: 3,<br>PRO A: 2, HIS A:248      | 5       | 1         | 6                 |

**Table S4:** List of all interacting amino acids for CotH3

| CotH3         |                                                                                   |
|---------------|-----------------------------------------------------------------------------------|
| Ligands       | Interacting residues                                                              |
| Naamine A     | ASN A: 237, PHE A: 235, PHE A: 180, LEU A: 240, LEU A: 9                          |
| Naamine B     | LEU A: 9, PHE A: 180, LEU A: 240, LEU A: 193, THR A: 179, ARG A: 6, LEU A: 143    |
| Naamine D     | ASN A: 237, PHE A: 235, LEU A: 240, LEU A: 9, PHE A: 180, LEU A: 143, LEU A: 193  |
| Naamine E     | SER A: 87, TRP A: 89, LEU A: 83, GLY A: 98, ALA A: 100, ALA A: 91, ASN A: 95      |
| Naamine F     | PHE A: 235, ASN A: 237, ARG A: 6, LEU A: 9, VAL A: 244, PHE A: 180, LEU A: 240    |
| Naamine G     | LEU A: 240, PHE A: 180, LEU A: 9, THR A: 241, VAL A: 244                          |
| Naamidine A   | LEU A: 240, PHE A: 180, VAL A: 244, ARG A: 6, THR A: 3, THR A: 144                |
| Naamidine B   | PHE A: 235, LEU A: 193, VAL A: 231, PHE A: 180, ARG A: 6, LEU A: 9, LEU A: 240    |
| Naamidine C   | PHE A: 235, ASN A: 237, LEU A: 240, PHE A: 180, VAL A: 244                        |
| Hyrtimomine A | LEU A: 9, VAL A: 244, ARG A: 6, LEU A: 240                                        |
| Hyrtimomine B | THR A: 241, LEU A: 9, PHE A: 180, ARG A: 6, VAL A: 244                            |
| Hyrtimomine C | LEU A: 143, LEU A: 227, TYR A: 197                                                |
| Hyrtimomine F | THR A: 241, PHE A: 180, LEU A: 240, VAL A: 244                                    |
| Hyrtimomine G | LEU A: 143, THR A: 241, VAL A: 231, VAL A: 244, LEU A: 240, PHE A: 180, THR A:144 |
| Topsentin     | LEU A: 143, VAL A: 231, LEU A: 240, PHE A: 180, LEU A: 9, ARG A: 6,               |
| Topsentin A   | PHE A: 235,PHE A: 110, LEU A: 240, LEU A: 9, ARG A: 6                             |
| Topsentin D   | PHE A: 180, LEU A: 240, LEU A: 143, LEU A: 9, VAL A: 244, PHE A: 235              |
| Latrunculin A | ASN A: 237, LEU A: 240, LEU A: 9                                                  |
| Latrunculin B | VAL A: 231, LEU A: 143, PHE A: 235, PHE A: 200, LEU A: 193, THR A: 228            |
| Latrunculin S | ALA A: 91, SER A: 87                                                              |

|                    |                                                                                                                                    |
|--------------------|------------------------------------------------------------------------------------------------------------------------------------|
| Xestodecalactone A | GLY A: 98, ASN A: 95, ALA A: 91, ALA A: 100                                                                                        |
| Xestodecalactone B | ALA A: 91, GLY A: 98, ASP A: 84, ALA A: 100                                                                                        |
| Xestodecalactone C | PHE A: 192, VAL A: 231, LEU A: 143, PHE A: 235                                                                                     |
| Xestodecalactone D | LYS A: 109, PRO A: 106, ALA A: 110                                                                                                 |
| Xestodecalactone E | ALA A: 91, ASN A: 95, VAL A: 90, TYR A: 101, ALA A: 100                                                                            |
| Xestodecalactone F | THR A: 241, VAL A: 244, PHE A: 180, LEU A: 240                                                                                     |
| (+)-Curcudiol      | PHE A: 235, PHE A: 180, LEU A: 240, LEU A: 9, ARG A: 6                                                                             |
| (+)-Curcuphenol    | PHE A: 480, LEU A: 240, LEU A: 9, ARG A: 6                                                                                         |
| Tetillapyrone      | ARG A: 6                                                                                                                           |
| Nortetillapyrone   | TYR A: 10, VAL A: 244, PHE A: 180                                                                                                  |
| Aurantioside K     | GLN A: 4, THR A: 38, THR A: 3, PRO A: 2, HIS A:248, ASP A: 258, LEU A: 240, PHE A: 235, VAL A: 244, LEU A: 9, PHE A: 180, ARG A: 6 |
| Aurantioside I     | TRP A: 147, ASP A: 175, ASP A: 177, GLU A: 7, ASN A: 40, ASP A: 148, ASP A: 146, GLY A: 178                                        |
| <b>Drugs</b>       |                                                                                                                                    |
| Amphotericin B     | ASP A : 44, GLN A: 4, LEU A: 42, ASP A: 43                                                                                         |
| Isavuconazole      | ASN A: 237, LEU A: 143, PHE A: 180, LEU A: 240, LEU A: 193                                                                         |
| Posaconazole       | LEU A: 193, THR A: 3, PHE A: 180, LEU A: 240, ARG A: 6, LEU A: 9                                                                   |

**Table S5:** Molecular docking output for the target Mucorin

| Mucorin       |                                  |                                               |         |           |                   |
|---------------|----------------------------------|-----------------------------------------------|---------|-----------|-------------------|
| Ligands       | Binding affinity<br>(Kcal/mol-1) | H bond residues                               | H bonds | C-H bonds | Hydrophobic bonds |
| Naamine D     | -7.1                             | GLU A: 97, PHE A: 3                           | 2       | 0         | 3                 |
| Naamidine A   | -7.9                             | PHE A: 3, ARG A: 139, GLN A: 14               | 3       | 2         | 5                 |
| Naamidine B   | -7.8                             | ARG A: 139, GLN A: 14                         | 2       | 2         | 6                 |
| Naamidine C   | -8.0                             | GLN A: 14, TRP A: 140                         | 2       | 1         | 7                 |
| Hyrtimomine A | -7.5                             | GLU A: 97                                     | 1       | 1         | 3                 |
| Hyrtimomine C | -7.2                             | ASP A: 96, ARG A: 139, GLN A: 14, GLU : 97    | 4       | 1         | 2                 |
| Hyrtimomine F | -7.6                             | ILE A: 113, ARG A: 130, GLU A: 133, GLU A: 74 | 4       | 2         | 1                 |
| Topsentin     | -8.4                             | LEU A: 142, GLU A: 97                         | 2       | 1         | 3                 |
| Topsentin A   | -8.3                             | GLY A: 97, LEU A: 142                         | 2       | 1         | 3                 |
| Topsentin D   | -8.2                             | None                                          | 0       | 2         | 4                 |
| Latrunculin S | -6.2                             | ALA A: 116, ILE A: 113                        | 2       | 0         | 1                 |



**Table S6:** List of all interacting amino acids for Mucoridin

| Mucoridin          |                                                                                                                                                                                 |
|--------------------|---------------------------------------------------------------------------------------------------------------------------------------------------------------------------------|
| Ligands            | Interacting residues                                                                                                                                                            |
| Naamine A          | LEU A: 142, MET A: 1, GLU A: 97, PHE A: 3, ILE A: 95                                                                                                                            |
| Naamine B          | PHE A: 3, MET A: 1, ILE A: 95, LEU A: 142, VAL A: 143, TYR A: 2, GLU A: 141, TRP A: 140, GLN A: 14, GLU A: 97                                                                   |
| Naamine D          | GLU A: 97, PHE A: 3, ILE A: 95, MET A: 1, VAL A: 143                                                                                                                            |
| Naamine E          | LEU A: 142, PHE A: 3, GLU A: 141, GLU A: 97, MET A: 1, ILE A: 95                                                                                                                |
| Naamine F          | GLU A: 141, GLN A: 14, TRP A: 140, MET A: 1, LEU A: 142, ILE A: 95, TYR A: 2                                                                                                    |
| Naamine G          | PHE A: 3, GLU A: 97, LEU A: 142, TYR A: 2, ILE A: 95, MET A: 1                                                                                                                  |
| Naamidine A        | PHE A: 3, ARG A: 139, GLN A: 14, GLU A: 97, TRP A: 140, GLU A: 141, MET A: 1, VAL A: 143, LEU A: 142, ILE A: 95                                                                 |
| Naamidine B        | ARG A: 139, GLN A: 14, GLU A: 141, MET A: 1, ILE A: 95, VAL A: 143, LEU A: 142, TYR A: 2, TRP A: 140, GLU A: 97                                                                 |
| Naamidine C        | GLN A: 14, TRP A: 140, GLU A: 97, ARG A: 139, GLU A: 141, MET A: 1, ILE A: 95, VAL A: 143, LEU A: 142, TYR A: 2                                                                 |
| Hyrtimomine A      | GLU A: 97, LEU A: 142, ILE A: 95, TYR A: 2, MET A: 1                                                                                                                            |
| Hyrtimomine B      | GLU A: 141, GLU A: 97, VAL A: 143, LEU A: 142, ILE A: 95, MET A: 1                                                                                                              |
| Hyrtimomine C      | ASP A: 96, ARG A: 139, GLN A: 14, GLU A: 97, LEU A: 142, ILE A: 95, GLU A: 141                                                                                                  |
| Hyrtimomine F      | ILE A: 113, ARG A: 130, GLU A: 133, GLU A: 74, ASP A: 112, SER A: 135, ALA A: 116                                                                                               |
| Hyrtimomine G      | PHE A: 3, ILE A: 95, MET A: 1, GLU A: 97, ALA A: 94, TYR A: 2                                                                                                                   |
| Topsentin          | LEU A: 142, GLU A: 97, TYR A: 2, ILE A: 95, GLU A: 141, MET A: 1                                                                                                                |
| Topsentin A        | GLY A: 97, LEU A: 142, ASP A: 96, TYR A: 2, ILE A: 95, GLU A: 141                                                                                                               |
| Topsentin D        | ILE A: 95, TYR A: 2, MET A: 1, GLU A: 141, GLU A: 97, ASP A: 96                                                                                                                 |
| Latrunculin A      | GLU A: 97, TYR A: 2, ILE A: 95, LEU A: 142                                                                                                                                      |
| Latrunculin B      | GLU A: 5, TYR A: 50, PHE A: 3, ILE A: 95, LEU A: 142                                                                                                                            |
| Latrunculin S      | ALA A: 116, ILE A: 113, ASP A: 112                                                                                                                                              |
| Xestodecalactone A | GLU A: 97, MET A: 1, LEU A: 142, ILE A: 95                                                                                                                                      |
| Xestodecalactone B | MET A: 1, GLY A: 99, ILE A: 95, LEU A: 142                                                                                                                                      |
| Xestodecalactone C | LEU A: 142, GLU A: 97, ILE A: 95                                                                                                                                                |
| Xestodecalactone D | LEU A: 142, MET A: 1, GLU A: 141, ILE A: 95                                                                                                                                     |
| Xestodecalactone E | LEU A: 142, MET A: 1, PHE A: 3, VAL A: 143, ILE A: 95, GLU A: 141                                                                                                               |
| Xestodecalactone F | ILE A: 95, MET A: 1, TYR A: 2, GLU A: 97                                                                                                                                        |
| (+)-Curcudiol      | MET A: 1, ILE A: 95, TYR A: 2                                                                                                                                                   |
| (+)-Curcuphenol    | ILE A: 95, TYR A: 2, TYR A: 50, LEU A: 142, PHE A: 2, PHE A: 50                                                                                                                 |
| Tetillapyrone      | PHE A: 3, LEU A: 142, TRP A: 140, ILE A: 95                                                                                                                                     |
| Nortetillapyrone   | GLN A: 14, PHE A: 3, GLY A: 99, GLU A: 97                                                                                                                                       |
| Aurantoside K      | PHE A: 3, GLU A: 5, ASN A: 52, GLU A: 97, VAL A: 143, LEU A: 142, ILE A: 95, MET A: 1                                                                                           |
| Aurantoside I      | ARG A: 130, SER A: 135, ASN A: 137, ILE A: 125, TYR A: 127, GLU A: 133                                                                                                          |
| <b>Drugs</b>       |                                                                                                                                                                                 |
| Amphotericin B     | GLN A: 76, ARG A: 67                                                                                                                                                            |
| Isavuconazole      | PHE A: 3, ILE A: 95, ALA A: 94, PHE A: 102, TYR A: 2                                                                                                                            |
| Posaconazole       | ARG A: 92, GLU A: 104, ASN A: 52, LEU A: 142, GLU A: 141, GLU A: 5, ILE A: 95, TYR A: 50, ASP A: 96, MET A: 1, ALA A: 94, TYR A: 2, GLU A: 97, TRP A: 140, ASP A: 98, GLN A: 14 |

Table S7: Molecular docking output for the target Exo-1, 3 beta-glucan synthase

| Exo-1,3 beta-glucan synthase |                                  |                                                          |         |           |                   |
|------------------------------|----------------------------------|----------------------------------------------------------|---------|-----------|-------------------|
| Ligands                      | Binding affinity<br>(Kcal/mol-1) | H bond residues                                          | H bonds | C-H bonds | Hydrophobic bonds |
| Naamine A                    | -9.2                             | ASP A: 138                                               | 1       | 1         | 5                 |
| Naamine B                    | -9.1                             | ARG A: 305, ASN A: 298, ASP A: 138, LEU A: 297           | 4       | 2         | 4                 |
| Naamine D                    | -9.2                             | ARG A: 305, SER A: 285, ASP A: 138                       | 3       | 2         | 5                 |
| Naamine E                    | -9.3                             | ASN A: 298, TYR A: 248, GLU A: 185                       | 3       | 0         | 3                 |
| Naamine F                    | -9.3                             | ARG A: 305, ASP A: 338, SER A: 285                       | 3       | 3         | 5                 |
| Naamine G                    | -8.8                             | LEU A: 297, ARG A: 305                                   | 2       | 2         | 6                 |
| Naamidine A                  | -10.6                            | HIS A: 128, LEU A: 297, ASP A: 138                       | 3       | 2         | 4                 |
| Naamidine B                  | -9.7                             | GLU A: 185, ASN A: 298, ARG A: 302                       | 3       | 0         | 6                 |
| Naamidine C                  | -10.7                            | TYR A: 22, SER A: 285, TYR A: 248, ARG A: 305            | 4       | 2         | 5                 |
| Hyrtimomine A                | -11.2                            | GLU A: 185, SER A: 285                                   | 2       | 0         | 3                 |
| Hyrtimomine B                | -11.0                            | TYR A: 248, GLU A: 185                                   | 2       | 0         | 3                 |
| Hyrtimomine C                | -10.6                            | ASN A: 139                                               | 1       | 0         | 7                 |
| Hyrtimomine F                | -9.9                             | ASN A: 139, LEU A: 297, GLY A: 136                       | 3       | 0         | 4                 |
| Hyrtimomine G                | -10.0                            | GLU A: 185, TYR A: 22, GLU A: 20, ASN A: 139, ASP A: 138 | 5       | 1         | 4                 |
| Topsentin                    | -10.3                            | LEU A: 297, ASP A: 138, ARG A: 305, GLU A: 185           | 4       | 2         | 2                 |
| Topsentin A                  | -10.1                            | ASP A: 138, LEU A: 297, GLU A: 185                       | 3       | 2         | 2                 |
| Topsentin D                  | -10.1                            | LEU A: 297, GLU A: 185, GLY A: 136, PHE A: 137           | 4       | 0         | 2                 |
| Latrunculin A                | -8.9                             | None                                                     | 0       | 0         | 2                 |
| Latrunculin B                | -8.8                             | TYR A: 310                                               | 1       | 1         | 2                 |
| Latrunculin S                | -8.3                             | ARG A: 258                                               | 1       | 0         | 2                 |
| Xestodecalactone A           | -8.4                             | ASN A: 139, ARG A: 305                                   | 2       | 0         | 3                 |
| Xestodecalactone B           | -8.3                             | ASN A: 139, LEU A: 297                                   | 2       | 0         | 1                 |
| Xestodecalactone C           | -8.4                             | ASN A: 139                                               | 1       | 0         | 3                 |
| Xestodecalactone D           | -8.7                             | ASN A: 139, LEU A: 297, ARG A: 305                       | 3       | 1         | 3                 |
| Xestodecalactone E           | -8.0                             | ASP A: 144, ASP A: 138                                   | 2       | 2         | 3                 |
| Xestodecalactone F           | -8.9                             | ASP A: 138, ASN A: 139                                   | 2       | 2         | 3                 |

**Table S8:** List of all interacting amino acids for fungal exo-1, 3-beta-glucan synthase

| Exo-1,3-beta-glucan synthase |                                                                                                                                    |
|------------------------------|------------------------------------------------------------------------------------------------------------------------------------|
| Ligands                      | Interacting residues                                                                                                               |
| Naamine A                    | ASP A: 138, GLU A: 185, PHE A: 137, PHE A: 251, HIS A: 266, HIS A: 128, TRP A: 356                                                 |
| Naamine B                    | ARG A: 305, ASN A: 298, ASP A: 138, LEU A: 297, ARG A: 184, GLU A: 185, PHE A: 251, TRP A: 356, HIS A: 128, HIS A: 246             |
| Naamine D                    | ARG A: 305, SER A: 285, ASP A: 138, PHE A: 137, GLU A: 20, TRP A: 356, HIS A: 246, HIS A: 128, PHE A: 251, GLU A: 185              |
| Naamine E                    | ASN A: 298, TYR A: 248, GLU A: 185, PHE A: 222, PHE A: 137, PHE A: 251                                                             |
| Naamine F                    | ARG A: 305, ASP A: 338, SER A: 285, ASN A: 298, TYR A: 310, GLU A: 185, PHE A: 251, PHE A: 137, TRP A: 356, HIS A: 128, HIS A: 246 |
| Naamine G                    | LEU A: 297, ARG A: 305, ASN A: 298, GLU A: 185, PHE A: 137, PHE A: 222, HIS A: 246, HIS A: 128, PHE A: 251, TRP A: 356             |
| Naamidine A                  | HIS A: 128, LEU A: 297, ASP A: 138, GLU A: 255, GLY A: 136, TRP A: 356, PHE A: 222, PHE A: 251, ASN A: 298                         |
| Naamidine B                  | GLU A: 185, ASN A: 298, ARG A: 302, TRP A: 356, TRP A: 366, TYR A: 248, PHE A: 251, PHE A: 222, PHE A: 137                         |
| Naamidine C                  | TYR A: 22, SER A: 285, TYR A: 248, ARG A: 305, GLU A: 20, HIS A: 128, TRP A: 356, HIS A: 247, PHE A: 137, GLU A: 185, PHE A: 251   |
| Hyrtimomine A                | GLU A: 185, SER A: 285, TRP A: 356, PHE A: 251, PHE A: 137                                                                         |
| Hyrtimomine B                | TYR A: 248, GLU A: 185, TRP A: 356, PHE A: 251, SER A: 285                                                                         |
| Hyrtimomine C                | ASN A: 139, TRP A: 356, TYR A: 248, GLU A: 20, PHE A: 251, PHE A: 137, ASP A: 138, GLU A: 185                                      |
| Hyrtimomine F                | ASN A: 139, LEU A: 297, GLY A: 136, ARG A: 305, ARG A: 302, PHE A: 137, ARG A: 143                                                 |
| Hyrtimomine G                | GLU A: 185, TYR A: 22, GLU A: 20, ASN A: 139, ASP A: 138, GLY A: 136, TRP A: 356, PHE A: 137, ARG A: 302, PHE A: 251               |
| Topsentin                    | LEU A: 297, ASP A: 138, ARG A: 305, GLU A: 185, GLY A: 136, PHE A: 137, PHE A: 251, ARG A: 302                                     |
| Topsentin A                  | ASP A: 138, LEU A: 297, GLU A: 185, GLY A: 136, PHE A: 137, ARG A: 302, PHE A: 251                                                 |
| Topsentin D                  | LEU A: 297, GLU A: 185, GLY A: 136, PHE A: 137, ARG A: 302, PHE A: 251                                                             |
| Latrunculin A                | PHE A: 251, PHE A: 137                                                                                                             |
| Latrunculin B                | TYR A: 310, PHE A: 251, PHE A: 137, ASN A: 298                                                                                     |
| Latrunculin S                | ARG A: 258, PHE A: 222, TRP A: 270                                                                                                 |
| Xestodecalactone A           | ASN A: 139, ARG A: 305, TRP A: 356, TYR A: 22, PHE A: 251                                                                          |
| Xestodecalactone B           | ASN A: 139, LEU A: 297, PHE A: 137                                                                                                 |
| Xestodecalactone C           | ASN A: 139, PHE A: 137, PHE A: 251, LEU A: 297                                                                                     |
| Xestodecalactone D           | ASN A: 139, LEU A: 297, ARG A: 305, ASN A: 298, PHE A: 251, PHE A: 137, TYR A: 310                                                 |
| Xestodecalactone E           | ASP A: 144, ASP A: 138, ASN A: 135, TYR A: 146, PHE A: 137, PHE A: 251, ARG A: 302                                                 |
| Xestodecalactone F           | ASP A: 138, ASN A: 139, ASN A: 298, TYR A: 248, PHE A: 137, TRP A: 356, ARG A: 143                                                 |
| (+)-Curcudiol                | LEU A: 297, PHE A: 222, PHE A: 137, PHE A: 251                                                                                     |
| (+)-Curcuphenol              | GLU A: 185, PHE A: 137, PHE A: 251, TRP A: 356, TYR A: 248                                                                         |
| Tetillapyrone                | ASN A: 139, TRP A: 356, PHE A: 137, PHE A: 251                                                                                     |
| Nortetillapyrone             | TYR A: 248, ASN A: 139, LEU A: 297, TRP A: 356                                                                                     |
| Aurantioside I               | GLN A: 223, HIS A: 247, GLU A: 255, TYR A: 248, ARG A: 258, PHE A: 251, ASN A: 269, HIS A: 246, TRP A: 356, HIS A: 128, PHE A: 222 |
| Aurantioside K               | THR A: 248, HIS A: 246, ASP A: 220, HIS A: 247, SER A: 252, PHE A: 251, PHE A: 337                                                 |
| <b>Drugs</b>                 |                                                                                                                                    |
| Amphotericin B               | HIS A: 246, PHE A: 225, ASP A: 273, ARG A: 258                                                                                     |
| Isavuconazole                | ASN A: 139, HIS A: 246, PHE A: 222, TRP A: 270, PHE A: 137, PHE A: 251, ASP A: 220, PHE A: 225, HIS A: 247                         |
| Posaconazole                 | GLN A: 223, TYR A: 310, VAL A: 224, PHE A: 222, PHE A: 225, HIS A: 247, HIS A: 245, PHE A: 137, PHE A: 251                         |

Table S9: Molecular docking output for the target RdRp

| Ligands            | Binding affinity<br>(Kcal/mol-1) | RdRp                                             |         |           |                   |
|--------------------|----------------------------------|--------------------------------------------------|---------|-----------|-------------------|
|                    |                                  | H bond residues                                  | H bonds | C-H bonds | Hydrophobic bonds |
| Naamine A          | -7.3                             | TRP A: 134                                       | 1       | 1         | 4                 |
| Naamine B          | -6.0                             | PHE A: 148, GLU A: 35                            | 2       | 2         | 1                 |
| Naamine E          | -6.3                             | GLU A: 35, ALA A: 38                             | 2       | 1         | 2                 |
| Naamine F          | -7.5                             | TRP A: 134                                       | 1       | 0         | 6                 |
| Naamine G          | -6.9                             | None                                             | 0       | 2         | 4                 |
| Naamidine A        | -7.6                             | TYR A: 13, PRO A: 10                             | 2       | 0         | 3                 |
| Naamidine B        | -7.6                             | ARG A: 49, SER A: 40, PHE<br>A: 48               | 3       | 1         | 3                 |
| Naamidine C        | -7.4                             | None                                             | 0       | 3         | 3                 |
| Hyrtimomine A      | -8.1                             | None                                             | 0       | 2         | 2                 |
| Hyrtimomine B      | -8.5                             | PRO A: 10, ILE A: 121                            | 2       | 0         | 3                 |
| Hyrtimomine C      | -8.1                             | ASP A: 89                                        | 1       | 2         | 2                 |
| Hyrtimomine F      | -8.3                             | SER A: 151, LEU A: 41, PHE<br>A: 48              | 3       | 2         | 2                 |
| Topsentin          | -8.6                             | ARG A: 136                                       | 1       | 0         | 4                 |
| Topsentin A        | -8.6                             | ILE A:121                                        | 1       | 0         | 5                 |
| Topsentin D        | -8.5                             | ARG A: 162                                       | 1       | 2         | 2                 |
| Latrunculin A      | -8.6                             | TRP A: 134                                       | 1       | 0         | 1                 |
| Latrunculin B      | -7.7                             | None                                             | 0       | 0         | 3                 |
| Latrunculin S      | -7.7                             | GLN A: 141                                       | 1       | 1         | 1                 |
| Xestodecalactone A | -7.3                             | ARG A: 49, SER A: 40, LEU<br>A: 41               | 3       | 0         | 1                 |
| Xestodecalactone B | -7.2                             | PRO A: 39, LEU A: 41, SER<br>A: 40, ARG A: 49    | 4       | 0         | 1                 |
| Xestodecalactone C | -6.8                             | PRO A: 10                                        | 1       | 0         | 3                 |
| Xestodecalactone D | -6.5                             | SER A: 151, SER A: 40                            | 2       | 1         | 3                 |
| Xestodecalactone E | -6.7                             | ASP A: 89, GLY A: 138                            | 2       | 0         | 4                 |
| Xestodecalactone F | -6.3                             | SER A: 151                                       | 1       | 0         | 3                 |
| Aurantioside K     | -8.3                             | ILE A: 121, PHE A: 133,<br>ARG A: 136, TYR A: 13 | 4       | 0         | 5                 |
| Aurantioside I     | -8.3                             | VAL A: 139, ARG A: 136,<br>GLY A: 138, LYS A: 3  | 4       | 1         | 5                 |

**Table S10:** List of all interacting amino acids for RNA dependent/directed RNA polymerase

| RdRp               |                                                                                                                  |
|--------------------|------------------------------------------------------------------------------------------------------------------|
| Ligands            | Interacting residues                                                                                             |
| Naamine A          | TRP A: 134, ASP A: 89, PRO A: 135, PRO A: 15, TYR A: 13, VAL A: 123                                              |
| Naamine B          | PHE A: 148, GLU A: 35, PRO A: 39, HIS A: 50, LEU A: 41                                                           |
| Naamine D          | PRO A: 39, SER A: 40, LEU A: 41, ALA A: 38, ARG A: 49                                                            |
| Naamine E          | GLU A: 35, ALA A: 38, GLU A: 35, PHE A: 148, ARG A: 49                                                           |
| Naamine F          | TRP A: 134, PRO A: 135, ILE A: 121, VAL A: 139, PRO A: 10, TYR A: 13, VAL A: 123                                 |
| Naamine G          | PRO A: 15, VAL A: 125, VAL A: 123, PRO A: 10, ILE A: 121, LEU A: 8                                               |
| Naamidine A        | TYR A: 13, PRO A: 10, PHE A: 133, VAL A: 123, PRO A: 15                                                          |
| Naamidine B        | ARG A: 49, SER A: 40, PHE A: 48, LEU A: 41, ILE A: 152, ALA A: 38, PHE A: 148                                    |
| Naamidine C        | VAL A: 123, PHE A: 133, LEU A: 8, PRO A: 10, VAL A: 125, PRO A: 15                                               |
| Hyrtimomine A      | TYR A: 13, PRO A: 10, VAL A: 123, PRO A: 15                                                                      |
| Hyrtimomine B      | PRO A: 10, ILE A: 121, ASP A: 89, PRO A: 15, PRO A: 135                                                          |
| Hyrtimomine C      | ASP A: 89, ILE A: 121, PRO A: 15, PRO A: 135                                                                     |
| Hyrtimomine F      | SER A: 151, LEU A: 41, PHE A: 48, PHE A: 148, ARG A: 49, GLU A: 35, SER A: 40                                    |
| Hyrtimomine G      | GLU A: 35, SERA : 151, LEU A: 41, SER A: 40, ARG A: 49                                                           |
| Topsentin          | ARG A: 136, PRO A: 10, VAL A: 123, PRO A: 15, PRO A: 135                                                         |
| Topsentin A        | ILE A:121, VAL A: 125, PRO A: 10, VAL A: 123, PRO A: 15, PRO A: 135                                              |
| Topsentin D        | ARG A: 162, TRP A: 185, ARG A: 165, LEU A: 166, VAL A: 164                                                       |
| Latrunculin A      | TRP A: 134, PRO A: 15                                                                                            |
| Latrunculin B      | PHE A: 133, VAL A: 123, TYR A: 13                                                                                |
| Latrunculin S      | GLN A: 141, PHE A: 133, LEU A: 140                                                                               |
| Xestodecalactone A | ARG A: 49, SER A: 40, LEU A: 41, SER A: 151                                                                      |
| Xestodecalactone B | PRO A: 39, LEU A: 41, SER A: 40, ARG A: 49, SER A: 151                                                           |
| Xestodecalactone C | PRO A: 10, VAL A: 123, ILE A: 121, PRO A: 135                                                                    |
| Xestodecalactone D | SER A: 151, SER A: 40, PHE A: 148, ALA A: 38, ILE A: 152, LEU A: 41                                              |
| Xestodecalactone E | ASP A: 89, GLY A: 138, VAL A: 123, PRO A: 10, TYR A: 13, PRO A: 15                                               |
| Xestodecalactone F | SER A: 151, LEU A: 41, PHE A: 148, PRO A:39                                                                      |
| (+)-Curcudiol      | PHE A: 133, VAL A: 123,PRO A: 10, VAL A: 125                                                                     |
| (+)-Curcuphenol    | TYR A: 2, VAL A: 125, PRO A: 10, TYR A: 13, VAL A: 123, PHE A: 133, PRO A: 15, ILE A: 121                        |
| Tetillapyrone      | ARG A: 165, TRP A: 185, LEU A: 166, VAL A: 164                                                                   |
| Nortetillapyrone   | HIS A: 50, SER A: 151                                                                                            |
| Aurantioside K     | ILE A: 121, PHE A: 133, ARG A: 136, TYR A: 13, VAL A: 123, PRO A: 10, VAL A: 125, PHE A: 128, GLY A: 138         |
| Aurantioside I     | VAL A: 139, ARG A: 136, GLY A: 138, LYS A: 3, ASP A: 89, VAL A: 125, VAL A: 123, PRO A: 10, TYR A: 13, SER A: 86 |
| <b>Drugs</b>       |                                                                                                                  |
| Amphotericin B     | ARG A: 136, ASP A: 89, TRP A: 134, PHE A: 128                                                                    |
| Isavuconazole      | PRO A: 10, VAL A: 123, PRO A: 15, PRO A: 135, ILE A: 121                                                         |
| Posaconazole       | TRP A: 134, VAL A: 123, PRO A: 10, PHE A: 128, PRO A: 15, PRO A: 135, ILE A: 121                                 |

**Table S11:** Molecular docking output for the target Rhizopuspepsin

| Rhizopuspepsin     |                                  |                                                       |         |           |                   |
|--------------------|----------------------------------|-------------------------------------------------------|---------|-----------|-------------------|
| Ligands            | Binding affinity<br>(Kcal/mol-1) | H bond residues                                       | H bonds | C-H bonds | Hydrophobic bonds |
| Naamine A          | -7.6                             | ASP A: 218                                            | 1       | 0         | 2                 |
| Naamine B          | -7.3                             | ASP A: 79                                             | 1       | 2         | 3                 |
| Naamine E          | -7.0                             | ASP A: 218, ASP A: 79                                 | 2       | 0         | 2                 |
| Naamine F          | -7.1                             | SER A: 76, GLY A: 220, THR A: 221                     | 3       | 0         | 4                 |
| Naamine G          | -6.1                             | ASP A: 276, VAL A: 277                                | 2       | 0         | 3                 |
| Naamidine A        | -8.5                             | ASP A: 35, GLY A: 78, ASP A: 79, SER A: 113           | 4       | 0         | 3                 |
| Naamidine B        | -7.8                             | ASP A: 218, TRP A: 294, ILE A: 130, SER A: 76         | 4       | 2         | 3                 |
| Naamidine C        | -7.8                             | THR A: 221, ARG A: 192, GLY A: 37                     | 3       | 0         | 3                 |
| Hyrtimomine A      | -9.1                             | GLU A: 16                                             | 1       | 0         | 6                 |
| Hyrtimomine B      | -9.3                             | ASP A: 218, ASP A: 35, THR A: 222, GLU A: 16          | 4       | 0         | 3                 |
| Hyrtimomine C      | -7.9                             | GLY A: 37, SER A: 76                                  | 2       | 0         | 4                 |
| Hyrtimomine F      | -9.0                             | GLY A: 37, GLY A: 78                                  | 2       | 2         | 3                 |
| Topsentin          | -9.3                             | ASP A: 79                                             | 1       | 2         | 3                 |
| Topsentin A        | -9.5                             | ASP A: 35, GLY A: 37, GLU A: 16, ASP A: 79, GLY A: 78 | 5       | 2         | 3                 |
| Topsentin D        | -9.6                             | GLY A: 220, GLU A: 16, ASP A: 33, SER A: 81           | 4       | 0         | 2                 |
| Latrunculin A      | -8.3                             | ASP A: 79                                             | 1       | 0         | 0                 |
| Latrunculin B      | -7.9                             | None                                                  | 0       | 0         | 0                 |
| Xestodecalactone A | -6.7                             | PHE A: 278                                            | 1       | 0         | 1                 |
| Xestodecalactone B | -6.7                             | ASP A: 274, ASN A: 13, LYS A: 305                     | 3       | 0         | 0                 |
| Xestodecalactone C | -7.7                             | ASN A: 13, ASP A: 14, SER A: 275                      | 3       | 0         | 2                 |
| Xestodecalactone D | -6.9                             | None                                                  | 0       | 1         | 1                 |
| Xestodecalactone E | -7.0                             | THR A: 222, GLY A: 220                                | 2       | 0         | 2                 |
| Xestodecalactone F | -7.7                             | None                                                  | 0       | 0         | 7                 |
| (+)-Curcudiol      | -6.8                             | ASP A: 79                                             | 1       | 0         | 5                 |
| Tetillapyrone      | -6.4                             | ASP A: 79, ASP A: 35                                  | 2       | 0         | 4                 |
| Nortetillapyrone   | -6.5                             | ASP A: 79, ASP A: 33                                  | 2       | 0         | 1                 |
| Aurantioside I     | -8.8                             | GLY A: 78, GLY A: 37, ASP A: 33                       | 3       | 1         | 7                 |
| Aurantioside K     | -8.1                             | GLU A: 16, GLY A: 220                                 | 2       | 2         | 5                 |

**Table S12:** List of all interacting amino acids for rhizopuspepsin

| Rhizopuspepsin     |                                                                                                                              |
|--------------------|------------------------------------------------------------------------------------------------------------------------------|
| Ligands            | Interacting residues                                                                                                         |
| Naamine A          | ASP A: 218, TYR A: 77, SER A: 39                                                                                             |
| Naamine B          | ASP A: 79, ILE A: 75, TRP A: 194, ASP A: 218, GLY A: 220, GLY A: 78                                                          |
| Naamine D          | ASN A: 13, VAL A: 277, ALA A: 161, LYS A: 162, ASP A: 14, GLU A: 280                                                         |
| Naamine E          | ASP A: 218, ASP A: 79, ILE A: 298, TYR A: 77                                                                                 |
| Naamine F          | SER A: 76, GLY A: 220, THR A: 221, ILE A: 130, TYR A: 77, ASP A: 218, ILE A: 298                                             |
| Naamine G          | ASP A: 276, VAL A: 277, LYS A: 162, ASP A: 14, LYS A: 305                                                                    |
| Naamidine A        | ASP A: 35, GLY A: 78, ASP A: 79, SER A: 113, TYR A: 77, LEU A: 223, ILE A: 225                                               |
| Naamidine B        | ASP A: 218, TRP A: 294, ILE A: 130, SER A: 76, GLY A: 220, GLY A: 78, PHE A: 296, TRP A: 194, THR A: 132                     |
| Naamidine C        | THR A: 221, ARG A: 192, GLY A: 37, ASP A: 218, TRP A: 194, ILE A: 130                                                        |
| Hyrtimomine A      | GLU A: 16, ASP A: 33, LEU A: 122, TYR A: 77, ASP A: 79, ASP A: 218, ILE A: 298                                               |
| Hyrtimomine B      | ASP A: 218, ASP A: 35, THR A: 222, GLU A: 16, TYR A: 77, ASP A: 33, LEU A: 122                                               |
| Hyrtimomine C      | GLY A: 37, SER A: 76, ASP A: 218, ASP A: 35, TRP A: 194, ILE A: 130                                                          |
| Hyrtimomine F      | GLY A: 37, GLY A: 78, ILE A: 130, TRP A: 194, ASP A: 218                                                                     |
| Hyrtimomine G      | ASP A: 33, THR A: 222, ILE A: 15, ASP A: 79, ASP A: 35, ASP A: 218, GLU A: 16                                                |
| Topsentin          | ASP A: 79, LEU A: 122, TRP A: 194, ILE A: 130, ASP A: 218, GLY A: 78                                                         |
| Topsentin A        | ASP A: 35, GLY A: 37, GLU A: 16, ASP A: 79, GLY A: 78, PHE A: 114, ASP A: 218, ILE A: 298, ASP A: 33, GLY A: 220             |
| Topsentin D        | GLY A: 220, GLU A: 16, ASP A: 33, SER A: 81, ASP A: 218, ASP A: 79                                                           |
| Latrunculin A      | ASP A: 79                                                                                                                    |
| Latrunculin B      | No residue interaction (Van der Waals only)                                                                                  |
| Latrunculin S      | ASP A: 79, GLY A: 220, THR A: 222                                                                                            |
| Xestodecalactone A | PHE A: 278, ASN A: 13                                                                                                        |
| Xestodecalactone B | ASP A: 274, ASN A: 13, LYS A: 305                                                                                            |
| Xestodecalactone C | ASN A: 13, ASP A: 14, SER A: 275, LYS A: 162, VAL A: 277                                                                     |
| Xestodecalactone D | SER A: 38, TRP A: 194                                                                                                        |
| Xestodecalactone E | THR A: 222, GLY A: 220, LEU A: 223, ASP A: 79                                                                                |
| Xestodecalactone F | ILE A: 298, TRP A: 194, TRP A: 294, PHE A: 296, ASP A: 79, THR A: 221, THR A: 222                                            |
| (+)-Curcudiol      | ASP A: 79, PHE A: 296, TRP A: 294, ILE A: 298, TRP A: 194, TYR A: 77                                                         |
| (+)-Curcuphenol    | ASP A: 218, ASP A: 35, LEU A: 122, ILE A: 216, ILE A: 298, PHE A: 296, TRP A: 194                                            |
| Tetillapyrone      | ASP A: 79, ASP A: 35, TYR A: 77, LEU A: 122, ASP A: 33, GLU A: 16                                                            |
| Nortetillapyrone   | ASP A: 79, ASP A: 33, ASP A: 218                                                                                             |
| Aurantioside K     | GLU A: 16, GLY A: 220, TRP A: 294, TRP A: 194, PHE A: 296, ILE A: 216, ILE A: 298, ASP A: 79, SER A: 113                     |
| Aurantioside I     | GLY A: 78, GLY A: 37, ASP A: 33, TYR A: 77, ASP A: 79, GLU A: 16, PHE A: 278, ILE A: 286, PHE A: 281, LEU A: 223, GLY A: 220 |
| <b>Drugs</b>       |                                                                                                                              |
| Amphotericin B     | GLY A: 220, GLU A: 279, GLY A: 246                                                                                           |
| Isavuconazole      | SER A: 81, SER A: 113, LEU A: 122, ASP A: 33, GLU A: 16                                                                      |
| Posaconazole       | ARG A: 192, GLY A: 78, GLY A: 37, GLY A: 220, ASP A: 33, ASP A: 79                                                           |

**Table S13:** Molecular docking output for the target lanosterol 14 alpha-demethylase

| Lanosterol 14 alpha-demethylase |                                  |                                                |         |           |                      |
|---------------------------------|----------------------------------|------------------------------------------------|---------|-----------|----------------------|
| Ligands                         | Binding affinity<br>(Kcal/mol-1) | H bond residues                                | H bonds | C-H bonds | Hydrophobic<br>bonds |
| Naamine A                       | -8.7                             | HIS A: 297, PHE A: 293, HIS A: 453             | 3       | 1         | 8                    |
| Naamine B                       | -8.1                             | PHE A: 293, HIS A: 297                         | 2       | 3         | 9                    |
| Naamine D                       | -6.9                             | GLN A: 459                                     | 1       | 0         | 4                    |
| Naamine E                       | -6.9                             | LYS A: 466                                     | 1       | 0         | 5                    |
| Naamine F                       | -7.2                             | SER A: 147                                     | 1       | 1         | 5                    |
| Naamine G                       | -6.8                             | None                                           | 0       | 0         | 6                    |
| Naamidine A                     | -7.8                             | GLN A: 459, LYS A: 341                         | 2       | 2         | 3                    |
| Naamidine B                     | -7.8                             | LYS A: 341                                     | 1       | 2         | 3                    |
| Naamidine C                     | -8.1                             | LYS A: 341, GLN A: 459                         | 2       | 3         | 4                    |
| Hyrtimomine A                   | -8.6                             | None                                           | 0       | 2         | 6                    |
| Hyrtimomine B                   | -8.7                             | ASN A: 429, ALA A: 436, LYS A: 142, ILE A: 456 | 4       | 0         | 1                    |
| Hyrtimomine C                   | -9.2                             | THR A: 492, SER A: 493                         | 2       | 0         | 3                    |
| Hyrtimomine F                   | -9.1                             | ASN A: 146, LYS A: 142, ASN A: 429, ILE A: 456 | 4       | 1         | 3                    |
| Hyrtimomine G                   | -8.9                             | HIS A: 453                                     | 1       | 3         | 9                    |
| Topsentin                       | -9.0                             | ASP A: 417, THR A: 344, LYS A: 466             | 3       | 0         | 4                    |
| Topsentin A                     | -9.2                             | LYS A: 466, ASP A: 417, THR A: 344             | 3       | 0         | 5                    |
| Topsentin D                     | -8.9                             | THR A: 344, ASP A: 417, SER A: 147, LYS A: 341 | 4       | 0         | 2                    |
| Latrunculin A                   | -8.4                             | ALA A: 436                                     | 1       | 1         | 0                    |
| Latrunculin B                   | -8.7                             | TYR A: 178, ASP A: 214, GLN A: 215             | 3       | 0         | 4                    |
| Latrunculin S                   | -8.9                             | ASP A: 214                                     | 1       | 1         | 0                    |
| Xestodecalactone A              | -8.4                             | GLN A: 459, PHE A: 337                         | 2       | 0         | 2                    |
| Xestodecalactone B              | -7.5                             | TYR A: 127                                     | 1       | 0         | 5                    |
| Xestodecalactone C              | -7.7                             | GLN A: 459, LEU A: 463                         | 2       | 0         | 3                    |
| Xestodecalactone D              | -7.0                             | ALA A: 290, TRY A: 127                         | 2       | 1         | 5                    |
| Xestodecalactone E              | -8.9                             | ARG A: 365, ALA A: 290                         | 2       | 0         | 8                    |
| Xestodecalactone F              | -7.0                             | ASP A: 347                                     | 1       | 4         | 3                    |
| Tetillapyrone                   | -7.5                             | TYR A: 113, HIS A: 453                         | 2       | 0         | 2                    |
| Nortetillapyrone                | -6.8                             | ARG A: 365, TYR A: 127                         | 2       | 0         | 3                    |
| Aurantoxide I                   | -8.4                             | ASP A: 417, LYS A: 341, ASP A: 347, LYS A: 466 | 4       | 3         | 4                    |
| Aurantoxide K                   | -8.3                             | LYS A: 327, GLU A: 342, GLU A: 323, ASP A: 319 | 4       | 1         | 6                    |



**Table S14:** List of all interacting amino acids for Lanosterol 14 alpha-demethylase

| Lanosterol 14 alpha-demethylase |                                                                                                                                                                       |
|---------------------------------|-----------------------------------------------------------------------------------------------------------------------------------------------------------------------|
| Ligands                         | Interacting residues                                                                                                                                                  |
| Naamine A                       | HIS A: 297, PHE A: 293, HIS A: 453, TYR A: 113, ILE A: 360, ARG A: 365, CYS A: 455, ALA A: 290, VAL A: 291, ILE A: 456, ILE A: 141, TYR A: 127                        |
| Naamine B                       | PHE A: 293, HIS A: 297, PHE A: 217, TYR A: 113, ARG A: 365, ILE A: 360, MET A: 363, ILE A: 141, VAL A: 291, ALA A: 290, ILE A: 456, CYS : 455, PHE A: 448, TYR A: 127 |
| Naamine D                       | GLN A: 459, HIS A: 420, LEU A: 463, LYS A: 341, VAL A: 419                                                                                                            |
| Naamine E                       | LEU A: 463, PHE A: 337, VAL A: 419, PRO A: 418, ASP A: 417, LYS A: 466                                                                                                |
| Naamine F                       | VAL A: 419, LEU A: 463, LEU A: 340, LYS A: 341, ASP A: 417 SER A: 147, PHE A: 337                                                                                     |
| Naamine G                       | LYS A: 218, VAL A: 497, ASP A: 214, HIS A: 179, HIS A: 297, TYR A: 178                                                                                                |
| Naamidine A                     | GLN A: 459, LYS A: 341, ASP A: 417, ASP A: 347, VAL A: 419, LYS A: 466, LYS A: 341                                                                                    |
| Naamidine B                     | LYS A: 341, ASP A: 417, ASP A: 347, VAL A: 419, LYS A: 466, HIS A: 420                                                                                                |
| Naamidine C                     | LYS A: 341, GLN A: 459, SER A: 147, ASP A:347, ASP A: 417, LYS A: 466, VAL A: 419, PRO A: 418, LYS A: 341                                                             |
| Hyrtimomine A                   | TYR A: 127, ARG A: 454, CYS A: 455, ILE A: 456, LYS A: 138, VAL A: 126, ALA A: 290, MET A: 494                                                                        |
| Hyrtimomine B                   | ASN A: 429, ALA A: 436, LYS A: 142, ILE A: 456, ARG A: 454                                                                                                            |
| Hyrtimomine C                   | THR A: 492, SER A: 493, ASP A: 214, VAL A: 497, LYS A: 218                                                                                                            |
| Hyrtimomine F                   | ASN A: 146, LYS A: 142, ASN A: 429, ILE A: 456, ALA A: 436, PHE A: 434, ARG A: 454, ALA A: 424                                                                        |
| Hyrtimomine G                   | HIS A: 453, LYS A: 138, VAL A: 126, MET A: 494, ILE A: 360, TYR A: 113, ARG A: 365, CYS A: 455, MET A: 363, ILE A: 456, TYR A: 127, ALA A: 290, GLY A: 294            |
| Topsentin                       | ASP A: 417, THR A: 344, LYS A: 466, PRO A: 418, VAL A: 419, PHE A: 337, LEU A: 463                                                                                    |
| Topsentin A                     | LYS A: 466, ASP A: 417, THR A: 344, LEU A: 463, PHE A: 337, VAL A: 419, ASP A: 347, PRO A: 418                                                                        |
| Topsentin D                     | THR A: 344, ASP A: 417, SER A: 147, LYS A: 341, LEUA: 463, PRO A: 418                                                                                                 |
| Latrunculin A                   | ALA A: 436, HIS A: 420                                                                                                                                                |
| Latrunculin B                   | TYR A: 178, ASP A: 214, GLN A: 215, HIS A: 297, VAL A: 497, HIS A: 179, TYR A: 211                                                                                    |
| Latrunculin S                   | ASP A: 214, GLN A: 215                                                                                                                                                |
| Xestodecalactone A              | GLN A: 459, PHE A: 337, LYS A: 341, LEU A: 463                                                                                                                        |
| Xestodecalactone B              | TYR A: 127, ILE A: 360, CYS A: 455, ARG A: 365, PHE A: 217, HIS A: 297                                                                                                |
| Xestodecalactone C              | GLN A: 459, LEU A: 463, LYS A: 341, PHE A: 337, LYS A: 466                                                                                                            |
| Xestodecalactone D              | ALA A: 290, TYR A: 127, ILE A: 360, HIS A: 297, VAL A: 495, PHE A: 217, MET A: 494, GLY A: 294                                                                        |
| Xestodecalactone E              | ARG A: 365, ALA A: 290, TYR A: 127, ILE A: 141, VAL A: 291, HIS A: 297, MET A: 494, PHE A: 217, CYS A: 455, ILE A: 456                                                |
| Xestodecalactone F              | ASP A: 347, ASP A: 417, PHE A: 337, LEU A: 463, PRO A: 418, THR A: 344, LYS A: 341, SER A: 147                                                                        |
| (+)-Curcudiol                   | VAL A: 495, MET A: 494, HIS A: 297, PHE A: 217, TYR A: 127, VAL A: 126, ALA A: 290, PHE A: 121                                                                        |
| (+)-Curcuphenol                 | LYS A: 466, LYS A: 341, LEU A: 463, PHE A: 337                                                                                                                        |
| Tetillapyrone                   | TYR A: 113, HIS A: 453, PHE A: 217, MET A: 494                                                                                                                        |
| Nortetillapyrone                | ARG A: 365, TYR A: 127, TYR A: 113, HIS A: 453, PHE A: 217                                                                                                            |
| Aurantoxide I                   | ASP A: 417, LYS A: 341, ASP A: 347, LYS A: 466, PRO A: 418, THR A: 416, LYS A: 341, LEU A: 345, ILE A: 413, LEU A: 463, PHE A: 337                                    |
| Aurantoxide K                   | LYS A: 327, GLU A: 342, GLU A: 323, ASP A: 319, LEU A: 463, VAL A: 419, PRO A: 418, TYR A: 462, LYS A: 341, PHE A: 337, ASN A: 414                                    |
| <b>Drugs</b>                    |                                                                                                                                                                       |
| Amphotericin B                  | ASP A: 176, ASN A: 503, PRO A: 501, LYS A: 484, ARG A: 500, TYR A: 168                                                                                                |
| Isavuconazole                   | LEU A: 340, PHE A: 337, LYS A: 341, LEU A: 463, GLN A: 459, ASP A: 417, PRO A: 418, VAL A: 419                                                                        |
| Posaconazole                    | LYS A: 466, SER A: 147, ILE A: 413, LEU A: 345, ASP A: 417, LYS A: 341, TYR A: 462, VAL A: 419, THR A: 344                                                            |

Table S15: Molecular docking output for the target lipase

| Fungal Lipase      |                                  |                                                   |         |           |                   |
|--------------------|----------------------------------|---------------------------------------------------|---------|-----------|-------------------|
| Ligands            | Binding affinity<br>(Kcal/mol-1) | H bond residues                                   | H bonds | C-H bonds | Hydrophobic bonds |
| Naamine A          | -7.5                             | None                                              | 0       | 0         | 3                 |
| Naamine B          | -7.5                             | None                                              | 0       | 1         | 4                 |
| Naamine D          | -6.1                             | ASP A: 217, ILE A: 221                            | 2       | 1         | 5                 |
| Naamine E          | -6.1                             | ASN A: 265, SOA : 4401, VAL<br>A: 216, PHE A: 223 | 4       | 1         | 2                 |
| Naamine F          | -7.1                             | SER A: 115                                        | 1       | 2         | 3                 |
| Naamine G          | -6.2                             | SER A: 142                                        | 1       | 0         | 4                 |
| Naamidine A        | -7.0                             | VAL A: 121                                        | 1       | 0         | 3                 |
| Naamidine B        | -7.9                             | SER A: 115, ASP A: 119, THR A:<br>88, THR A: 110  | 4       | 1         | 2                 |
| Naamidine C        | -7.9                             | SER A: 198, HIS A: 224, PHE A:<br>223, SER A: 250 | 4       | 1         | 3                 |
| Hyrtimomine A      | -7.6                             | THR A: 88, SER A: 142                             | 2       | 0         | 2                 |
| Hyrtimomine B      | -7.8                             | GLN A: 187, ASN A:144                             | 2       | 0         | 3                 |
| Hyrtimomine C      | -6.9                             | GLN A: 187                                        | 1       | 0         | 4                 |
| Hyrtimomine F      | -7.2                             | ASP A: 184                                        | 1       | 1         | 2                 |
| Hyrtimomine G      | -7.7                             | GLN A: 187, ASP A: 184, LEU<br>A: 180, ASN A: 144 | 4       | 0         | 2                 |
| Topsentin          | -7.6                             | SER A: 128, ASN A: 144, GLN<br>A: 187, ASP A: 184 | 4       | 0         | 4                 |
| Topsentin A        | -7.5                             | ARG A: 188, GLN A: 187, ASN<br>A: 144,            | 3       | 0         | 4                 |
| Topsentin D        | -7.6                             | ASP A: 217, THR A: 263                            | 2       | 1         | 3                 |
| Latrunculin A      | -7.5                             | VAL A: 121, HIS A: 136, THR<br>A: 88              | 3       | 0         | 1                 |
| Latrunculin B      | -6.9                             | VAL A: 121                                        | 1       | 1         | 1                 |
| Latrunculin S      | -7.3                             | ASP A: 119                                        | 1       | 0         | 0                 |
| Xestodecalactone A | -7.2                             | None                                              | 0       | 0         | 2                 |
| Xestodecalactone B | -6.4                             | None                                              | 0       | 0         | 5                 |
| Xestodecalactone C | -6.2                             | THR A: 45                                         | 1       | 1         | 1                 |
| Xestodecalactone D | -6.2                             | SER A: 198, ASP A: 119                            | 2       | 1         | 1                 |
| Xestodecalactone E | -6.9                             | THR A: 88, THR A: 110                             | 2       | 0         | 5                 |
| Xestodecalactone F | -6.1                             | HIS A: 136, VAL A: 121                            | 2       | 0         | 2                 |
| Tetillapyrone      | -5.9                             | PHE A: 223, ASP A: 217                            | 2       | 0         | 2                 |
| Nortetillapyrone   | -6.2                             | ASN A: 265, ASP A: 217, VAL<br>A: 216, PHE A: 223 | 4       | 0         | 1                 |
| Aurantioside I     | -7.4                             | SER A: 128, ARG A: 188, LYS A:<br>148             | 3       | 1         | 3                 |
| Aurantioside K     | -7.0                             | ARG A: 188, ASP A: 184, GLN<br>A: 187, ASN A: 144 | 4       | 0         | 2                 |

**Table S16:** List of all interacting amino acids for fungal lipase

| Lipase             |                                                                                                                 |
|--------------------|-----------------------------------------------------------------------------------------------------------------|
| Ligands            | Interacting residues                                                                                            |
| Naamine A          | VAL A: 121, ALA A: 116, HIS A: 136                                                                              |
| Naamine B          | ALA A: 116, THR A: 88, LEU A: 173, PHE A: 139, MET A: 120                                                       |
| Naamine D          | ASP A: 217, ILE A: 221, VAL A: 248, PRO A: 222, ASN A: 265, GLY A: 247, PHE A: 223, THR A: 263                  |
| Naamine E          | ASN A: 265, SOA : 4401, VAL A: 216, PHE A: 223, ILE A: 221, VAL A: 248, PRO A: 222                              |
| Naamine F          | SER A: 115, LEU A: 173, SER A: 142, PHE A: 139, THR A: 88, ALA A: 116                                           |
| Naamine G          | SER A: 142, ALA A: 116, LEU A: 173, THR A: 88, PHE A: 139                                                       |
| Naamidine A        | VAL A: 121, ALA A: 116, THR A: 88, THR A: 110                                                                   |
| Naamidine B        | SER A: 115, ASP A: 119, THR A: 88, THR A: 110, ALA A: 116, LEU A: 173, ALA A: 137                               |
| Naamidine C        | SER A: 198, HIS A: 224, PHE A: 223, SER A: 250, ILE A: 261, VAL A: 243, PRO A: 222, TYR A: 200                  |
| Hyrtimomine A      | THR A: 88, SER A: 142, LEU A: 173, VAL A: 121                                                                   |
| Hyrtimomine B      | GLN A: 187, ASN A:144, ASP A: 184, TYR A: 127, PRO A: 129                                                       |
| Hyrtimomine C      | GLN A: 187, ARG A: 188, ASP A: 184, LEU A: 140, PRO A: 129                                                      |
| Hyrtimomine F      | ASP A: 184, PRO A: 129, LEU A: 140                                                                              |
| Hyrtimomine G      | GLN A: 187, ASP A: 184, LEU A: 180, ASN A: 144, ARG A: 188, PRO A: 129                                          |
| Topsentin          | SER A: 128, ASN A: 144, GLN A: 187, ASP A: 184, VAL A: 147, LYS A: 148, TYR A: 148, TYR A: 127, PRO A: 129      |
| Topsentin A        | ARG A: 188, GLN A: 187, ASN A: 144, PRO A: 129, SER A: 128, TYR A: 127, ASP A: 184                              |
| Topsentin D        | ASP A: 217, THR A: 263, ASN A: 265, VAL A: 248, ILE A: 261, SOA : 4401                                          |
| Latrunculin A      | VAL A: 121, HIS A: 136, THR A: 88, PHE A: 139                                                                   |
| Latrunculin B      | VAL A: 121, LEU A: 173, GLY A: 138                                                                              |
| Latrunculin S      | ASP A: 119                                                                                                      |
| Xestodecalactone A | THR A: 88, LEU A: 173                                                                                           |
| Xestodecalactone B | ALA A: 116, VAL A: 121, LEU A: 173, PHE A: 139, ALA A: 116                                                      |
| Xestodecalactone C | THR A: 45, ILE A: 41, LYS A: 42                                                                                 |
| Xestodecalactone D | SER A: 115, ASP A: 119, ALA A: 116                                                                              |
| Xestodecalactone E | THR A: 88, THR A: 110, PHE A: 139, LEU A: 173, HIS A: 136, VAL A: 121, MET A: 120                               |
| Xestodecalactone F | HIS A: 136, VAL A: 121, LEU A: 173, PHE A: 139                                                                  |
| (+)-Curcudiol      | ASN A: 144, LEU A: 140, TYR A: 127, PRO A: 129, TYR A: 143, LEU A: 180, ASP A: 184                              |
| (+)-Curcuphenol    | ASN A: 144, ASP A: 184, TYR A: 143, LEU A: 180, TYR A: 127, PRO A: 129                                          |
| Tetillapyrone      | PHE A: 223, ASP A: 217, VAL A: 248, HIS A: 224                                                                  |
| Nortetillapyrone   | ASN A: 265, ASP A: 217, VAL A: 216, PHE A: 223, HIS A: 224                                                      |
| Aurantioside I     | SER A: 128, ARG A: 188, LYS A: 148, PRO A: 129, ASN A: 144, TYR A: 186, TYR A: 215                              |
| Aurantioside K     | ARG A: 188, ASP A: 184, GLN A: 187, ASN A: 144, LEU A: 140, ALA A: 137                                          |
| <b>Drugs</b>       |                                                                                                                 |
| Amphotericin B     | GLN A: 100, ASN A: 46, PRO A: 162, ASN A: 196, LYS A: 42                                                        |
| Isavuconazole      | ASP A: 217, VAL A: 216, PRO A: 194, PRO A: 222, VAL A: 248, LYS A: 195                                          |
| Posaconazole       | GLN A: 100, TYR A: 78, PRO A: 75, LYS A: 42, LEU A: 44, HIS A: 224, ASN A: 46, GLU A: 48, ALA A: 99, SER A: 250 |

**Table S17:** Lipinski and additional parameters to examine drug-likeness

| Drug Like Physicochemical Properties |                        |                    |                  |                     |                |                              |
|--------------------------------------|------------------------|--------------------|------------------|---------------------|----------------|------------------------------|
| Ligands                              | Mol. Weight<br>(g/mol) | Rotatable<br>bonds | H bond<br>donors | H bond<br>acceptors | C Log P        | TPSA                         |
|                                      | MW $\leq$ 500          | RB $\leq$ 10       | HBD $\leq$ 5     | HBA $\leq$ 10       | Log p $\leq$ 5 | (Å <sup>2</sup> ) $\leq$ 140 |
| Naamine A                            | 323.39                 | 5                  | 2                | 3                   | 2.7            | 73.30                        |
| Naamine B                            | 367.44                 | 6                  | 2                | 4                   | 2.91           | 72.4                         |
| Naamine E                            | 369.41                 | 6                  | 3                | 5                   | 2.39           | 102.76                       |
| Naamine F                            | 353.41                 | 6                  | 2                | 4                   | 2.7            | 82.53                        |
| Naamine G                            | 383.44                 | 7                  | 2                | 5                   | 2.7            | 91.76                        |
| Naamidine A                          | 433.46                 | 6                  | 2                | 6                   | 2.53           | 109.05                       |
| Naamidine B                          | 463.49                 | 7                  | 2                | 7                   | 2.39           | 118.28                       |
| Naamidine C                          | 447.49                 | 6                  | 1                | 6                   | 2.78           | 100.26                       |
| Hyrtimomine B                        | 359.33                 | 1                  | 4                | 5                   | 2.02           | 111.38                       |
| Hyrtimomine C                        | 331.32                 | 1                  | 4                | 4                   | 2.3            | 101.47                       |
| Hyrtimomine F                        | 375.33                 | 2                  | 5                | 5                   | 1.26           | 135.28                       |
| Hyrtimomine G                        | 380.35                 | 5                  | 6                | 6                   | 1.15           | 146.64                       |
| Topsentin                            | 342.35                 | 3                  | 4                | 3                   | 2.89           | 97.56                        |
| Topsentin A                          | 326.35                 | 3                  | 3                | 2                   | 3.24           | 77.33                        |
| Topsentin D                          | 328.37                 | 3                  | 3                | 2                   | 2.64           | 73.04                        |
| Latrunculin B                        | 395.51                 | 1                  | 2                | 5                   | 2.51           | 110.16                       |
| Xestodecalactone A                   | 264.27                 | 0                  | 2                | 5                   | 1.75           | 83.83                        |
| Xestodecalactone B                   | 280.27                 | 0                  | 3                | 6                   | 0.89           | 104.06                       |
| Xestodecalactone C                   | 280.27                 | 0                  | 3                | 6                   | 0.89           | 104.06                       |
| Xestodecalactone D                   | 310.30                 | 1                  | 3                | 7                   | 0.97           | 113.29                       |
| Xestodecalactone E                   | 366.41                 | 5                  | 2                | 7                   | 2.42           | 102.29                       |
| Xestodecalactone F                   | 350.41                 | 5                  | 2                | 6                   | 2.78           | 85.22                        |
| Tetillapyrone                        | 242.23                 | 2                  | 3                | 6                   | 0.11           | 100.13                       |
| Nortetillapyrone                     | 228.20                 | 2                  | 3                | 6                   | -0.25          | 100.13                       |
| Aurantioside K                       | 743.15                 | 12                 | 8                | 15                  | -1.11          | 268.23                       |

**Table S18:** Swiss-ADME selective parameters

| Swiss-ADME analysis |                  |                 |               |              |
|---------------------|------------------|-----------------|---------------|--------------|
| Ligands             | Water solubility | Bioavailability | GI Absorption | BBB Permeant |
| Naamine A           | Moderate         | 0.55            | High          | Yes          |
| Naamine B           | Moderate         | 0.55            | High          | Yes          |
| Naamine E           | Moderate         | 0.55            | High          | No           |
| Naamine F           | Moderate         | 0.55            | High          | No           |
| Naamine G           | Poor             | 0.55            | High          | No           |
| Naamidine A         | Poor             | 0.55            | High          | No           |
| Naamidine B         | Poor             | 0.55            | High          | No           |
| Naamidine C         | Poor             | 0.55            | High          | No           |
| Hyrtimomine A       | Poor             | 0.55            | High          | No           |
| Hyrtimomine B       | Poor             | 0.56            | High          | No           |
| Hyrtimomine C       | Poor             | 0.55            | High          | No           |
| Hyrtimomine F       | Moderate         | 0.55            | High          | No           |
| Hyrtimomine G       | Moderate         | 0.55            | Low           | No           |
| Topsentin           | Poor             | 0.55            | High          | No           |
| Topsentin A         | Poor             | 0.55            | High          | No           |
| Topsentin D         | Poor             | 0.55            | High          | Yes          |
| Latrunculin B       | Soluble          | 0.55            | High          | No           |
| Xestodecalactone A  | Soluble          | 0.55            | High          | No           |
| Xestodecalactone B  | Soluble          | 0.55            | High          | No           |
| Xestodecalactone C  | Soluble          | 0.55            | High          | No           |
| Xestodecalactone D  | Soluble          | 0.55            | High          | No           |
| Xestodecalactone E  | Moderate         | 0.55            | High          | No           |
| Xestodecalactone F  | Soluble          | 0.55            | High          | No           |
| Tetillapyrone       | Soluble          | 0.55            | High          | No           |
| Nortetillapyrone    | Soluble          | 0.55            | High          | No           |
| Aurantoside K       | Soluble          | 0.11            | Low           | No           |

**Table S19:** OSIRIS analysis for potential harmful properties and druggability

| OSIRIS             |                    |                     |                       |                          |            |               |     |
|--------------------|--------------------|---------------------|-----------------------|--------------------------|------------|---------------|-----|
| Ligands            | Irritant potential | Mutagenic potential | Tumorigenic potential | Reproductive effectivity | Drug Score | Drug likeness |     |
| Risk Level         |                    |                     |                       |                          | Score      | Yes/No        |     |
| Naamine A          | Low risk           | Low risk            | Low risk              | Low risk                 | 0.79       | 3.45          | Yes |
| Naamine B          | Low risk           | Low risk            | Low risk              | Low risk                 | 0.82       | 4.63          | Yes |
| Naamine E          | Low risk           | Low risk            | Low risk              | Low risk                 | 0.80       | 4.13          | Yes |
| Naamine F          | Low risk           | Low risk            | Low risk              | Low risk                 | 0.78       | 3.83          | Yes |
| Naamine G          | Low risk           | Low risk            | Low risk              | Low risk                 | 0.76       | 4.68          | Yes |
| Naamidine A        | Low risk           | Low risk            | Low risk              | Low risk                 | 0.74       | 4.83          | Yes |
| Naamidine B        | Low risk           | Low risk            | Low risk              | Low risk                 | 0.71       | 5.63          | Yes |
| Naamidine C        | Low risk           | Low risk            | Low risk              | Low risk                 | 0.74       | 4.13          | Yes |
| Hyrtimomine B      | Low risk           | Low risk            | Low risk              | Low risk                 | 0.65       | 0.51          | Yes |
| Hyrtimomine C      | Low risk           | Low risk            | Low risk              | Low risk                 | 0.58       | 0.48          | Yes |
| Hyrtimomine F      | Low risk           | Low risk            | High risk             | Low risk                 | 0.26       | -2.19         | No  |
| Hyrtimomine G      | Low risk           | Low risk            | Low risk              | Low risk                 | 0.53       | -0.75         | No  |
| Topsentin          | Low risk           | Low risk            | Low risk              | Low risk                 | 0.74       | 3.72          | Yes |
| Topsentin A        | Low risk           | Low risk            | Low risk              | Low risk                 | 0.70       | 3.2           | Yes |
| Topsentin D        | Low risk           | Low risk            | Low risk              | Low risk                 | 0.78       | 3.82          | Yes |
| Latrunculin B      | Low risk           | Low risk            | Low risk              | Low risk                 | 0.34       | -10.38        | No  |
| Xestodecalactone A | Low risk           | Low risk            | Low risk              | Low risk                 | 0.45       | -6.35         | No  |
| Xestodecalactone B | Low risk           | Low risk            | Low risk              | Low risk                 | 0.59       | -0.93         | No  |
| Xestodecalactone C | Low risk           | Low risk            | Low risk              | Low risk                 | 0.59       | -0.93         | No  |
| Xestodecalactone D | Low risk           | Low risk            | Low risk              | Low risk                 | 0.58       | -1.01         | No  |
| Xestodecalactone E | High risk          | Low risk            | Low risk              | Low risk                 | 0.24       | -6.96         | No  |
| Xestodecalactone F | High risk          | Low risk            | Low risk              | Low risk                 | 0.24       | -6.99         | No  |
| Tetillapyrone      | Low risk           | Low risk            | Low risk              | Low risk                 | 0.71       | 0.03          | Yes |
| Nortetillapyrone   | Low risk           | Low risk            | Low risk              | Low risk                 | 0.72       | 0.04          | Yes |
| Aurantioside K     | High Risk          | Low risk            | Low risk              | High Risk                | 0.15       | 0.83          | Yes |

**Table S20:** Predictions for potential toxicity using ProTox-II and pkCSM servers

| Ligands            | ProTox-II          |                | PkCSM Toxicity Analysis |                                |                 |
|--------------------|--------------------|----------------|-------------------------|--------------------------------|-----------------|
|                    | LD50 value (mg/kg) | Toxicity Class | Hepatotoxicity          | <i>T.Pyriformis</i> (log ug/L) | Minnow (log mM) |
| Naamine A          | 2000               | 4              | Yes                     | 0.285                          | 0.448           |
| Naamine B          | 3679               | 5              | Yes                     | 0.286                          | 0.993           |
| Naamine E          | 3740               | 5              | No                      | 0.285                          | 1.149           |
| Naamine F          | 2000               | 4              | Yes                     | 0.285                          | 0.695           |
| Naamine G          | 3740               | 5              | No                      | 0.285                          | 1.04            |
| Naamidine A        | 3200               | 5              | Yes                     | 0.285                          | 3.248           |
| Naamidine B        | 3250               | 5              | Yes                     | 0.285                          | 3.593           |
| Naamidine C        | 3200               | 5              | Yes                     | 0.285                          | 3.136           |
| Hyrtimomine B      | 2000               | 4              | Yes                     | 0.285                          | -0.04           |
| Hyrtimomine C      | 2000               | 4              | Yes                     | 0.287                          | 2.196           |
| Hyrtimomine F      | 1500               | 4              | Yes                     | 0.286                          | 2.083           |
| Hyrtimomine G      | 200                | 3              | No                      | 0.292                          | 3.537           |
| Topsentin          | 1600               | 4              | No                      | 0.285                          | 2.089           |
| Topsentin A        | 1264               | 4              | No                      | 0.285                          | 1.775           |
| Topsentin D        | 750                | 4              | Yes                     | 0.299                          | 0.219           |
| Latrunculin B      | 1000               | 4              | Yes                     | 0.314                          | 2.261           |
| Xestodecalactone A | 450                | 4              | No                      | 0.198                          | 2.456           |
| Xestodecalactone B | 450                | 4              | No                      | 0.278                          | 3.475           |
| Xestodecalactone C | 450                | 4              | No                      | 0.278                          | 3.475           |
| Xestodecalactone D | 1500               | 4              | No                      | 0.306                          | 3.789           |
| Xestodecalactone E | 1500               | 4              | No                      | 0.322                          | 2.29            |
| Xestodecalactone F | 5000               | 5              | No                      | 0.382                          | 1.843           |
| Tetillapyrone      | 144                | 3              | No                      | 0.319                          | 2.829           |
| Nortetillapyrone   | 144                | 3              | No                      | 0.289                          | 3.132           |
| Aurantioside K     | 5000               | 5              | No                      | 0.285                          | 9.573           |

**Table S21:** StopTox acute toxicity analysis:

| <b>StopTox Acute Toxicity Analysis</b> |                            |                      |                        |                           |                                 |
|----------------------------------------|----------------------------|----------------------|------------------------|---------------------------|---------------------------------|
| <b>Ligands</b>                         | <b>Inhalation toxicity</b> | <b>Oral toxicity</b> | <b>Dermal toxicity</b> | <b>Skin sensitization</b> | <b>Irritation and corrosion</b> |
| Naamine A                              | No                         | Yes                  | No                     | Yes                       | Eyes (Yes), Skin (Yes)          |
| Naamine B                              | No                         | Yes                  | No                     | Yes                       | Eyes (Yes), Skin (No)           |
| Naamine E                              | No                         | Yes                  | No                     | Yes                       | Eyes (Yes), Skin (No)           |
| Naamine F                              | No                         | Yes                  | No                     | Yes                       | Eyes (Yes), Skin (No)           |
| Naamine G                              | No                         | Yes                  | No                     | Yes                       | Eyes (Yes), Skin (No)           |
| Naamidine A                            | No                         | No                   | No                     | No                        | Eyes (Yes), Skin (No)           |
| Naamidine B                            | No                         | No                   | No                     | No                        | Eyes (Yes), Skin (No)           |
| Naamidine C                            | No                         | Yes                  | No                     | No                        | Eyes (Yes), Skin (No)           |
| Hyrtimomine B                          | No                         | No                   | No                     | No                        | Eyes (Yes), Skin (No)           |
| Hyrtimomine C                          | No                         | Yes                  | No                     | No                        | Eyes (Yes), Skin (No)           |
| Hyrtimomine F                          | No                         | No                   | No                     | No                        | Eyes (Yes), Skin (No)           |
| Hyrtimomine G                          | No                         | No                   | No                     | No                        | Eyes (Yes), Skin (No)           |
| Topsentin                              | No                         | No                   | No                     | No                        | Eyes (Yes), Skin (No)           |
| Topsentin A                            | No                         | Yes                  | No                     | No                        | Eyes (No), Skin (No)            |
| Topsentin D                            | No                         | Yes                  | No                     | No                        | Eyes (No), Skin (No)            |
| Latrunculin B                          | No                         | No                   | No                     | No                        | Eyes (Yes), Skin (No)           |
| Xestodecalactone A                     | No                         | No                   | Yes                    | No                        | Eyes (Yes), Skin (No)           |
| Xestodecalactone B                     | No                         | No                   | Yes                    | No                        | Eyes (Yes), Skin (No)           |
| Xestodecalactone C                     | No                         | No                   | Yes                    | No                        | Eyes (Yes), Skin (No)           |
| Xestodecalactone D                     | No                         | No                   | Yes                    | No                        | Eyes (No), Skin (No)            |
| Xestodecalactone E                     | No                         | No                   | No                     | Yes                       | Eyes (No), Skin (No)            |
| Xestodecalactone F                     | No                         | No                   | Yes                    | Yes                       | Eyes (No), Skin (No)            |
| Tetillapyrone                          | No                         | No                   | No                     | No                        | Eyes (No), Skin (No)            |
| Nortetillapyrone                       | No                         | No                   | No                     | No                        | Eyes (No), Skin (No)            |
| Aurantioside K                         | No                         | No                   | No                     | No                        | Eyes (Yes), Skin (No)           |



Table S22: Molinspiration output for potential bioactivity

| Molinspiration Prediction |             |                       |                  |                         |                    |                  |
|---------------------------|-------------|-----------------------|------------------|-------------------------|--------------------|------------------|
| Ligands                   | GPCR Ligand | Ion channel Modulator | Kinase Inhibitor | Nuclear receptor Ligand | Protease Inhibitor | Enzyme Inhibitor |
| Naamine A                 | 0.36        | 0.10                  | 0.20             | -0.05                   | 0.01               | 0.28             |
| Naamine B                 | 0.06        | -0.35                 | -0.14            | -0.23                   | -0.29              | -0.06            |
| Naamine D                 | 0.29        | 0.13                  | 0.34             | -0.14                   | 0.07               | 0.28             |
| Naamine E                 | 0.29        | 0.05                  | 0.16             | -0.13                   | -0.03              | 0.23             |
| Naamine F                 | 0.30        | 0.05                  | 0.16             | -0.11                   | -0.03              | 0.24             |
| Naamine G                 | 0.25        | 0.04                  | 0.15             | -0.12                   | -0.02              | 0.24             |
| Naamidine A               | 0.24        | -0.13                 | 0.06             | -0.27                   | -0.28              | 0.04             |
| Naamidine B               | 0.20        | -0.15                 | 0.04             | -0.30                   | -0.30              | 0.03             |
| Naamidine C               | 0.24        | -0.15                 | 0.01             | -0.32                   | -0.26              | 0.01             |
| * Hyrtimomine A           | 0.17        | 0.09                  | 0.53             | -0.13                   | -0.23              | 0.30             |
| Hyrtimomine B             | 0.32        | 0.09                  | 0.18             | 0.05                    | -0.03              | 0.38             |
| Hyrtimomine C             | 0.48        | 0.38                  | 0.10             | -0.03                   | 0.01               | 0.29             |
| Hyrtimomine F             | 0.19        | 0.17                  | -0.01            | -0.29                   | -0.14              | 0.10             |
| Hyrtimomine G             | 0.16        | 0.11                  | 0.13             | 0.06                    | 0.03               | 0.12             |
| *Topsentin                | 0.50        | 0.16                  | 0.70             | 0.17                    | -0.18              | 0.47             |
| * Topsentin A             | 0.47        | 0.12                  | 0.64             | 0.01                    | -0.20              | 0.42             |
| Topsentin D               | 0.21        | 0.29                  | 0.08             | -0.22                   | -0.02              | 0.17             |
| Latrunculin A             | 0.17        | 0.14                  | -0.53            | 0.55                    | 0.06               | 0.51             |
| Latrunculin B             | 0.15        | 0.11                  | -0.6             | 0.54                    | 0.05               | 0.51             |
| Latrunculin S             | 0.33        | 0.07                  | -0.54            | 0.50                    | 0.28               | 0.47             |
| Xestodecalactone A        | -0.10       | -0.11                 | -0.49            | 0.25                    | -0.19              | 0.26             |
| Xestodecalactone B        | 0.12        | 0.02                  | -0.35            | 0.61                    | 0.02               | 0.53             |
| Xestodecalactone C        | 0.12        | 0.02                  | -0.35            | 0.61                    | 0.02               | 0.53             |
| Xestodecalactone D        | 0.12        | -0.01                 | -0.30            | 0.40                    | -0.01              | 0.43             |
| Xestodecalactone E        | 0.12        | -0.05                 | -0.34            | 0.30                    | 0.03               | 0.32             |
| Xestodecalactone F        | 0.14        | 0.04                  | -0.20            | 0.34                    | -0.01              | 0.46             |
| (+)-Curcudiol             | -0.14       | -0.01                 | -0.49            | 0.32                    | -0.38              | 0.01             |
| (+)-Curcuphenol           | -0.40       | -0.1                  | -0.73            | 0.03                    | -0.67              | -0.03            |
| Tetillapyrone             | -0.08       | -0.66                 | -0.65            | -0.65                   | 0.03               | 0.59             |
| Nortetillapyrone          | -0.10       | -0.65                 | -0.75            | -0.78                   | -0.18              | 0.58             |
| Aurantioside I            | -0.85       | -1.92                 | -1.59            | -1.73                   | -0.49              | -0.91            |
| Aurantioside K            | -0.70       | -1.74                 | -1.40            | -1.56                   | -0.37              | -0.72            |
| Drugs                     |             |                       |                  |                         |                    |                  |
| Amphotericin B            | -3.06       | -3.51                 | -3.54            | -3.45                   | -2.45              | -2.95            |
| Isavuconazole             | 0           | -0.07                 | 0                | -0.18                   | -0.07              | 0                |

|                                                                               |       |       |       |       |       |       |
|-------------------------------------------------------------------------------|-------|-------|-------|-------|-------|-------|
| Posaconazole                                                                  | -0.63 | -1.78 | -1.40 | -1.50 | -0.57 | -1.20 |
| (* potential to be strong kinase inhibitors – effective against target CotH3) |       |       |       |       |       |       |
